# Supplementary material for: Zwitterion detection with a fluorescent squaramide cryptand: a study on size-dependent salt recognition and sensing
Source: Royal Society of Chemistry journal article supplement (doi:10.1039/d4qo01136h), 2024-01-01
Supplement: d4qo01136h1.pdf [file d4qo01136h1.pdf]

# Zwitterion Detection with a Fluorescent Squaramide Cryptand: A Study in Size-Dependent Salt Recognition and Sensing

*Marta Zaleskaya-Hernik, Marcin Wilczek, Łukasz Dobrzycki and Jan Romański \**

<sup>†</sup> Faculty of Chemistry, University of Warsaw, Pasteura 1, PL 02-093 Warsaw, Poland

Supporting Information

## Table of Contents

|           |                                                               |           |
|-----------|---------------------------------------------------------------|-----------|
| <b>1.</b> | <b>General information</b>                                    | <b>1</b>  |
| <b>2.</b> | <b>Synthetic procedures and chemical details of compounds</b> | <b>2</b>  |
| <b>3.</b> | <b>Crystal data</b>                                           | <b>13</b> |
| <b>4.</b> | <b>NMR experiments</b>                                        | <b>17</b> |
|           | - NMR titration experiments                                   | 17        |
|           | - 2D spectra (Mechanochemical encapsulation)                  | 25        |
| <b>5.</b> | <b>Emission spectra</b>                                       | <b>29</b> |
| <b>6.</b> | <b>References</b>                                             | <b>31</b> |

## General information

Unless specifically indicated, all other chemicals and reagents used in this study were purchased from commercial sources and used as received. If necessary purification of products was performed using column chromatography on silica gel (Merck Kieselgel 60, 230-400 mesh) with mixtures of chloroform/methanol. Thin-layer chromatography (TLC) was performed on silica gel plates (Merck Kieselgel 60 F254). <sup>1</sup>H and <sup>13</sup>C NMR spectra used in the characterization

of products were recorded on Bruker Avance 300 MHz spectrometer. Two-dimensional NMR spectra (ROESY, COSY and HSQC) were recorded on a Bruker Avance III HD 500 MHz. In each case, the spectra were calibrated at the residual solvent resonances. Multiplets were assigned as s (singlet), d (doublet), and m (multiplet). The HRMS data were obtained on a Quattro LC Micromass or Shimadzu LCMS-IT-TOF unit.

### **Synthetic procedures and chemical details of compounds**

#### **Preparation of compound E.**

1,8-Diaminoanthracene was obtained from commercially available 1,8-dinitroanthraquinone in two steps according to the procedure described in the literature. [38] To a solution of 1,8-diaminoanthracene (1.0 g, 4.8 mmol) in 40 mL of methanol was added dimethyl squarate (1.36 g, 9.6 mmol). After being stirred for 48 h at room temperature, the reaction mixture was concentrated and purified by silica gel column chromatography (10 % methanol in chloroform) to give compound E as a dark green solid (1.84 g, 4.3 mmol, 90 % yield).

HRMS (ESI): Calculated for  $C_{24}H_{17}N_2O_6$ ,  $[M + H]^+$ : 429.10811, found:429.10839.

$^1H$  NMR (300 MHz, DMSO- $d_6$ , 25°C)  $\delta$  11.33 (s, 2H), 9.00 (s, 1H), 8.71 (s, 1 H), 8.07-7.90 (m, 2H), 7.70-7.45 (m, 2H), 7.45-7.30 (m, 2H), 4.34 (s, 6H).

$^{13}C$  NMR (75 MHz, DMSO- $d_6$ , 25°C)  $\delta$  189.2, 185.1, 179.2, 171.3, 133.5, 132.1, 127.5, 126.7, 126.2, 126.0, 120.8, 118.2, 61.0.

#### **Preparation of receptor 2.**

To a solution of compound E ( 0.5 g, 2.4 mmol) in 20 mL of methanol was added benzylamine (0.54 mL, 4.8 mmol) and triethylamine (0.726 mL, 9.6 mmol) and the mixture was stirred 24 h at room temperature. The reaction mixture was then centrifuged and the collected solid

material was washed repeatedly with methanol. The obtained dark yellow solid was dried in vacuo to give the receptor **2** (1.16 g, 2.0 mmol, 83 % yield).

HRMS (ESI): Calculated for  $C_{36}H_{27}N_4O_4$ ,  $[M + H]^+$ :579.20268, found:579.20342.

$^1H$  NMR (300 MHz, DMSO- $d_6$ , 25°C)  $\delta$  10.16 (s, 2H), 8.89 (s, 1H), 8.69 (s, 1 H), 8.20-7.96 (m, 2H), 7.96-7.80 (m, 2H), 7.60-7.20 (m, 14H), 4.95-4.75 (s, 4H).

$^{13}C$  NMR (75 MHz, DMSO- $d_6$ , 25°C)  $\delta$  185.8, 181.4, 169.9, 139.0, 133.7, 132.5, 132.3, 129.2, 128.3, 128.1, 128.0, 127.9, 126.3, 125.0, 124.8, 124.6, 117.7, 117.6, 47.7.

### Preparation of receptor **3**.

To a stirred solution of the 1,10-Diaza-18-crown-6 (0.8 g, 3.05 mmol), potassium carbonate (1.94 g, 18.3 mmol) and a catalytic amount of potassium iodide (70 mg, 0.42 mmol) in 100 mL of acetonitrile 3-(chloromethyl)benzotrile (0.92 g, 6.1 mmol) were added. The solution was refluxed overnight under argon. Acetonitrile was removed under a vacuum, and the solid residue was taken up in chloroform and washed with distilled water. The organic phase was dried over  $MgSO_4$ , and the organic solvent was removed under reduced pressure. The residue was dissolved in a minimal amount of chloroform and loaded on silica gel. The silica gel was eluted with 2% methanol in chloroform. The obtained white-off solid was dried in vacuo to give the receptor **3** (1.29 g, 2.62 mmol, 86 % yield).

HRMS (ESI): Calculated for  $C_{28}H_{36}N_4O_4 Na$ ,  $[M + Na]^+$ :515.26288, found:515.26371.

$^1H$  NMR (300 MHz, DMSO- $d_6$ , 25°C)  $\delta$  7.79 (s, 2H), 7.70-7.60 (m, 4H), 7.60-7.40 (m, 2H), 3.70 (s, 4H), 3.60-3.45 (m, 16H), 2.80-2.55 (m, 8H).

$^{13}\text{C}$  NMR (75 MHz, DMSO- $d_6$ , 25°C)  $\delta$  142.5, 134.0, 133.7, 132.2, 130.9, 129.7, 119.5, 111.5, 70.5, 69.6, 58.5, 54.0.

### Preparation of receptor 1.

To a stirred solution of receptor **3** (0.3 g, 0.6 mmol) in anhydrous tetrahydrofuran (7 mL) was added dropwise under an argon atmosphere 1 M suspension of  $\text{LiAlH}_4$  (4.8 ml, 4.8 mmol) in tetrahydrofuran. The reaction mixture was stirred overnight at room temperature under an argon atmosphere. The reaction was quenched by a minimum amount of aqueous saturated magnesium sulfate solution under a chilling temperature. The slurry mixture was filtered under vacuum and the residue washed with ethyl acetate. The combined filtrates dried over  $\text{MgSO}_4$  and evaporated in a vacuum. The crude product A was obtained as a pale yellow oil and used in the next step without further purification. A solution of the compound E (0.25 g, 0.58 mmol) in methanol (150 mL) was heated to 70°C, triethylamine (0.484 mL, 3.48 mmol) was added then the compound A (0.29 g, 0.58 mmol) in methanol (20 ml) was added dropwise via syringe pump (at 2 mL/Hr). The mixture was stirred at reflux for 72 h under an argon atmosphere. The resulting crude precipitate was isolated by filtration and finally was then recrystallized from the DMSO/methanol mixture. The obtained dark yellow solid was dried in vacuo to give the desired receptor **1** (0.31g, 0.36 mmol, 62 % yield).

HRMS (ESI): Calculated for  $\text{C}_{50}\text{H}_{52}\text{N}_6\text{O}_8 \text{Na}$ ,  $[\text{M} + \text{Na}]^+$ : 887.37388, found: 887.37392.

$^1\text{H}$  NMR (300 MHz, DMSO- $d_6$ , 60°C)  $\delta$  9.99 (s, 2H), 8.91 (s, 1H), 8.69 (s, 1H), 8.18 (s, 2H), 8.00-7.85 (m, 2H), 7.60-7.40 (m, 2H), 7.40-7.10 (m, 10H), 5.15-4.75 (m, 4H), 3.70 (s, 4H), 3.67-3.30 (m, 16H), 2.80-2.55 (m, 8H).

$^{13}\text{C}$  NMR (75 MHz, DMSO- $d_6$ , 60°C)  $\delta$  185.6, 181.3, 170.3, 165.0, 138.7, 133.8, 132.3, 132.0, 129.0, 128.4, 128.2, 126.3, 126.2, 125.0, 124.8, 124.5, 124.1, 117.5, 70.7, 70.5, 69.7, 59.6, 54.5, 53.9, 47.9.

#### **Preparation of compound N1.**

To a stirred solution of the 1-aza-18-crown-6 (0.5 g, 1.90 mmol), potassium carbonate (0.79 g, 5.7 mmol) and a catalytic amount of potassium iodide (70 mg, 0.42 mmol) in 50 mL of acetonitrile 3-(chloromethyl)benzonitrile (0.3 g, 1.90 mmol) were added. The solution was refluxed overnight under argon. Acetonitrile was removed under a vacuum, and the solid residue was taken up in chloroform and washed with distilled water. The organic phase was dried over  $\text{MgSO}_4$ , and the organic solvent was removed under reduced pressure. The residue was dissolved in a minimal amount of chloroform and loaded on silica gel. The silica gel was eluted with 1% methanol in chloroform. The obtained white-off solid was dried in vacuo to give the compound N1 (0.54 g, 1.43 mmol, 75 % yield).

HRMS (ESI): Calculated for  $\text{C}_{20}\text{H}_{30}\text{N}_2\text{O}_5 \text{Na}$ ,  $[\text{M} + \text{Na}]^+$ : 401.20469, found: 401.20432.

$^1\text{H}$  NMR (300 MHz, DMSO- $d_6$ , 25°C)  $\delta$  7.80 (s, 1H), 7.79-7.65 (m, 2H), 7.65-7.45 (m, 1H), 3.70 (s, 2H), 3.69-3.35 (m, 20H), 2.75-2.52 (m, 4H).

$^{13}\text{C}$  NMR (125 MHz, DMSO- $d_6$ , 25°C)  $\delta$  137.56, 133.50, 133.30, 130.50, 129.45, 118.92, 111.18, 70.01, 69.90, 69.79, 69.56, 61.86, 60.21, 53.34.

#### **Preparation of compound A1.**

To a stirred solution of compound N1 (0.5 g, 1.3 mmol) in anhydrous tetrahydrofuran (10 mL) was added dropwise under an argon atmosphere 1M suspension of  $\text{LiAlH}_4$  (5.2 mL, 5.2 mmol)

in tetrahydrofuran. The reaction mixture was stirred overnight at room temperature under an argon atmosphere. The reaction was quenched by a minimum amount of aqueous saturated magnesium sulfate solution under cooling. The slurry mixture was filtered under vacuum and the residue washed with ethyl acetate. The combined filtrates were dried over  $\text{MgSO}_4$  and evaporated in a vacuum. The compound A1 was obtained as a pale yellow oil and was used further without purification (0.4 g, 1.04 mmol, 80% yield).

HRMS (ESI): Calculated for  $\text{C}_{20}\text{H}_{34}\text{N}_2\text{O}_5 \text{Na}$ ,  $[\text{M} + \text{Na}]^+$ : 405.48498 found: 405.48485.

$^1\text{H}$  NMR (300 MHz,  $\text{DMSO-d}_6$ ,  $25^\circ\text{C}$ )  $\delta$  7.38-7.05 (m, 4H), 3.70 (s, 2H), 3.60 (s, 2H), 3.59-3.40 (m, 22H), 2.75-2.55 (m, 4H).

$^{13}\text{C}$  NMR (75 MHz,  $\text{DMSO-d}_6$ ,  $25^\circ\text{C}$ )  $\delta$  144.48, 139.98, 128.27, 127.70, 126.92, 125.90, 70.58, 70.45, 70.16, 69.66, 61.20, 59.82, 53.86, 46.15.

#### **Preparation of receptor 4.**

Compound E1 was synthesized according to the procedure described in the literature.[39] To a solution of the compound E1 (0.275 g, 0.91 mmol) in anhydrous dichloromethane (30 mL), DIPEA (0.32 mL, 1.82 mmol) and the compound A1 (0.35 g, 0.91 mmol) were added. The mixture was stirred at reflux for 48 h under an argon atmosphere. The residue was dissolved in a minimal amount of chloroform and loaded on silica gel. The silica gel was eluted with 10% methanol in chloroform. The obtained yellow oil was dried in vacuo to give the desired receptor **4** (0.31 g, 0.47 mmol, 52 % yield).

HRMS (ESI): Calculated for  $\text{C}_{38}\text{H}_{43}\text{N}_3\text{O}_7 \text{Na}$ ,  $[\text{M} + \text{Na}]^+$ : 676.29932, found: 676.2986.

$^1\text{H}$  NMR (300 MHz, DMSO- $d_6$ , 60°C)  $\delta$  10.00 (s, 1H), 8.81 (s, 1H), 8.64 (s, 1H), 8.49 (s, 1H), 8.25-8.05 (m, 2H), 7.92-7.82 (m, 1H), 7.65-7.20 (m, 8H), 4.89 (s, 2H), 3.75-3.65 (m, 2H), 3.65-3.45 (m, 20H), 2.85-2.60 (m, 4H).

$^{13}\text{C}$  NMR (125 MHz, DMSO- $d_6$ , 60°C)  $\delta$  185.15, 180.36, 169.58, 164.51, 138.49, 133.27, 131.75, 131.18, 130.94, 128.60, 128.29, 127.86, 126.60, 126.09, 125.95, 125.27, 124.50, 123.95, 121.00, 115.88, 69.94, 69.81, 69.56, 53.21, 47.17.

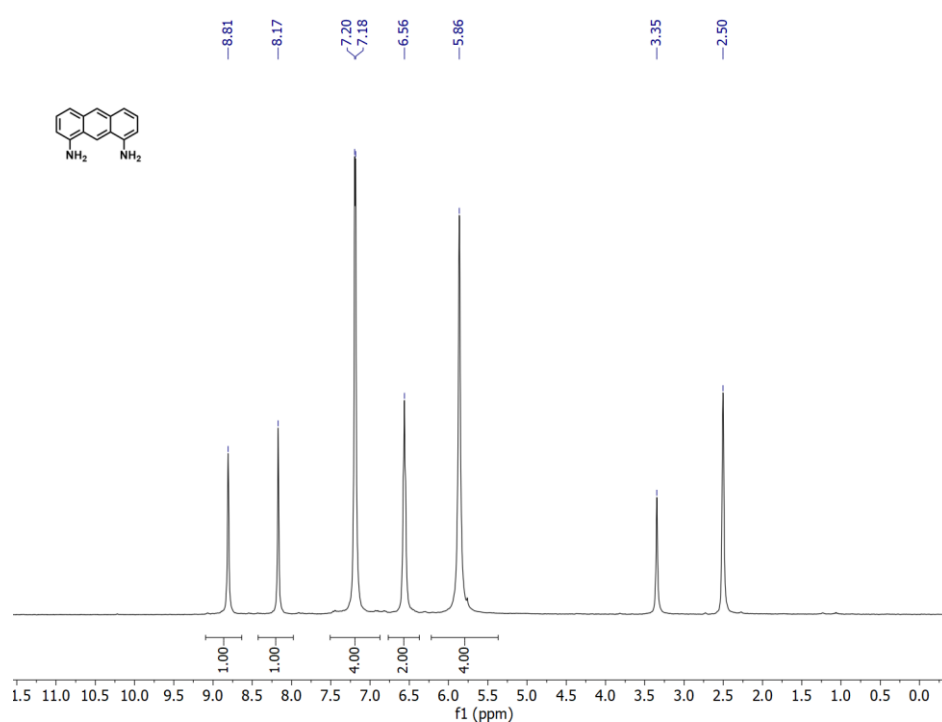

**Fig. S1.**  $^1\text{H}$  NMR spectrum of 1,8-diaminoanthracene in DMSO- $d_6$ .

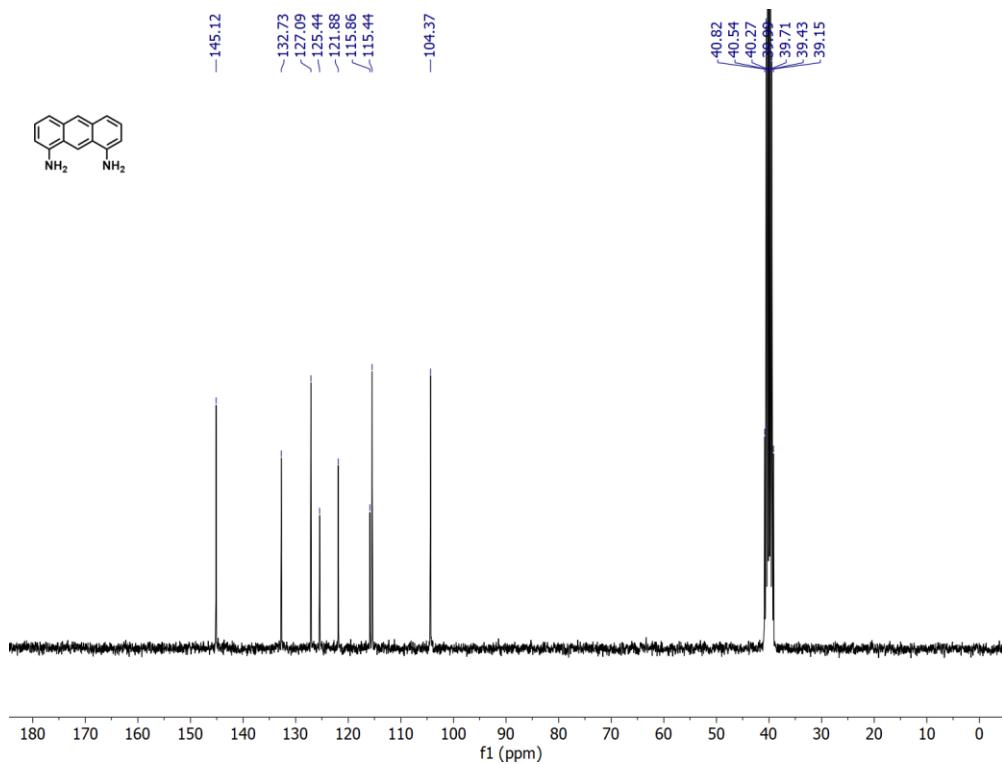

**Fig. S2.**  $^{13}\text{C}$  NMR spectrum of 1,8-diaminoanthracene in  $\text{DMSO-d}_6$ .

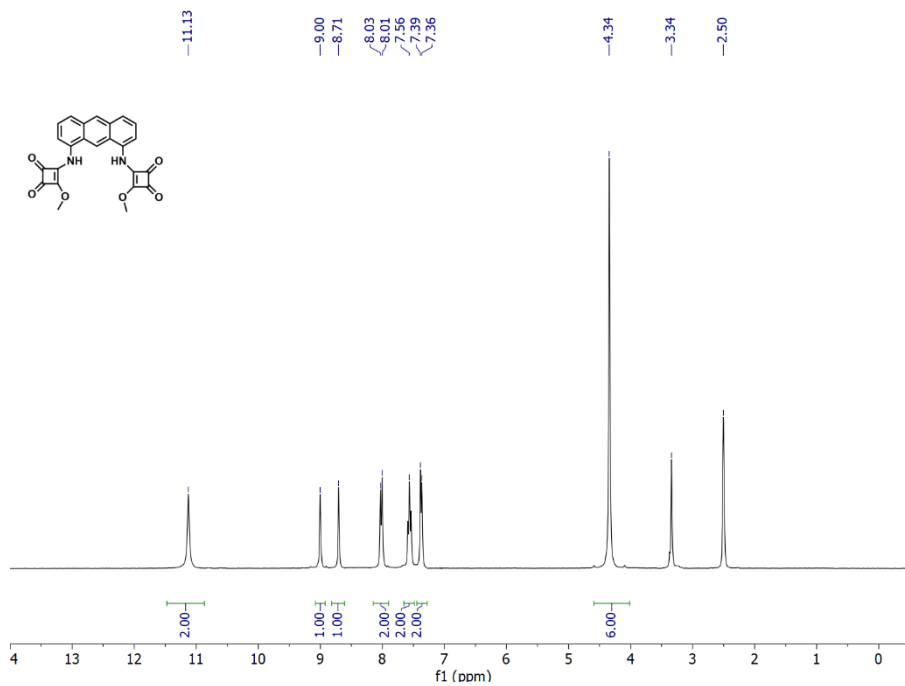

**Fig. S3.**  $^1\text{H}$  NMR spectrum of compound E in  $\text{DMSO-d}_6$ .



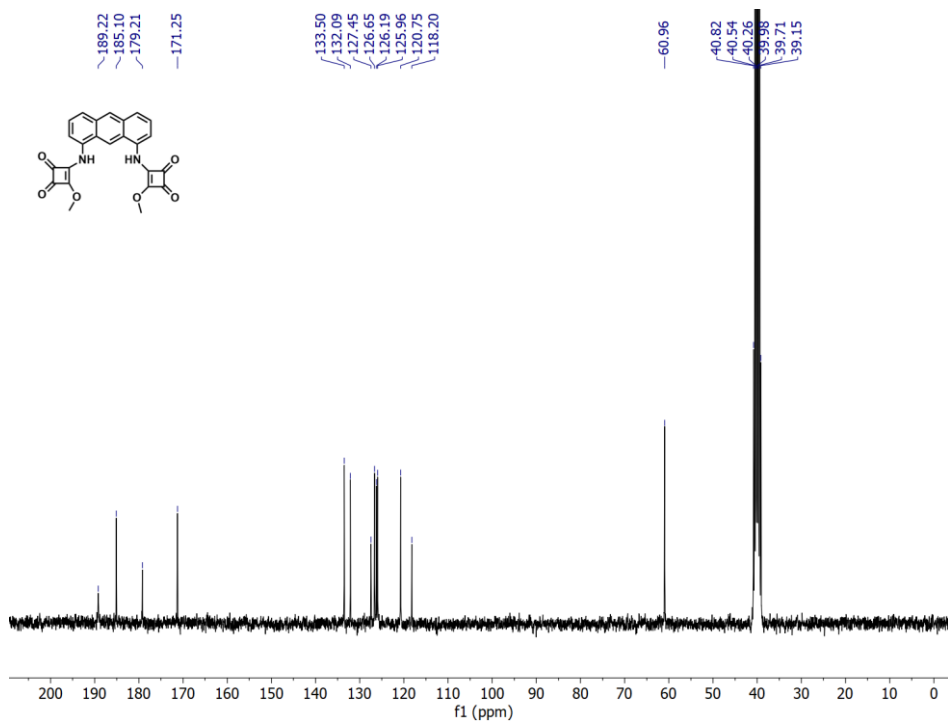

**Fig. S4.**  $^{13}\text{C}$  NMR spectrum of compound E in DMSO- $\text{d}_6$ .

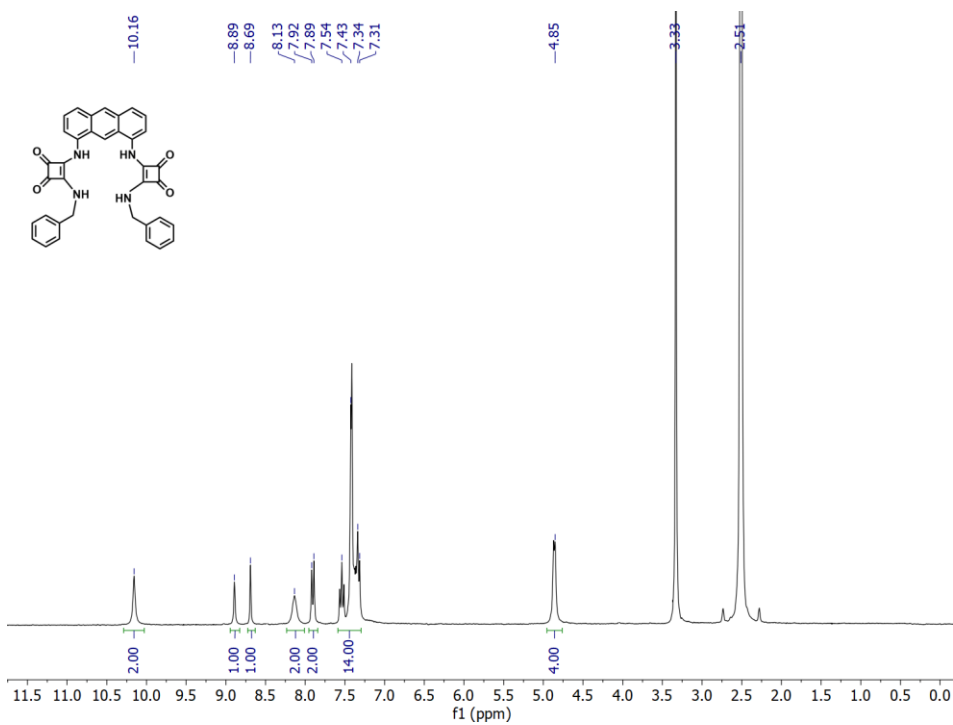

**Fig. S5.**  $^1\text{H}$  NMR spectrum of receptor 2 in DMSO- $\text{d}_6$ .

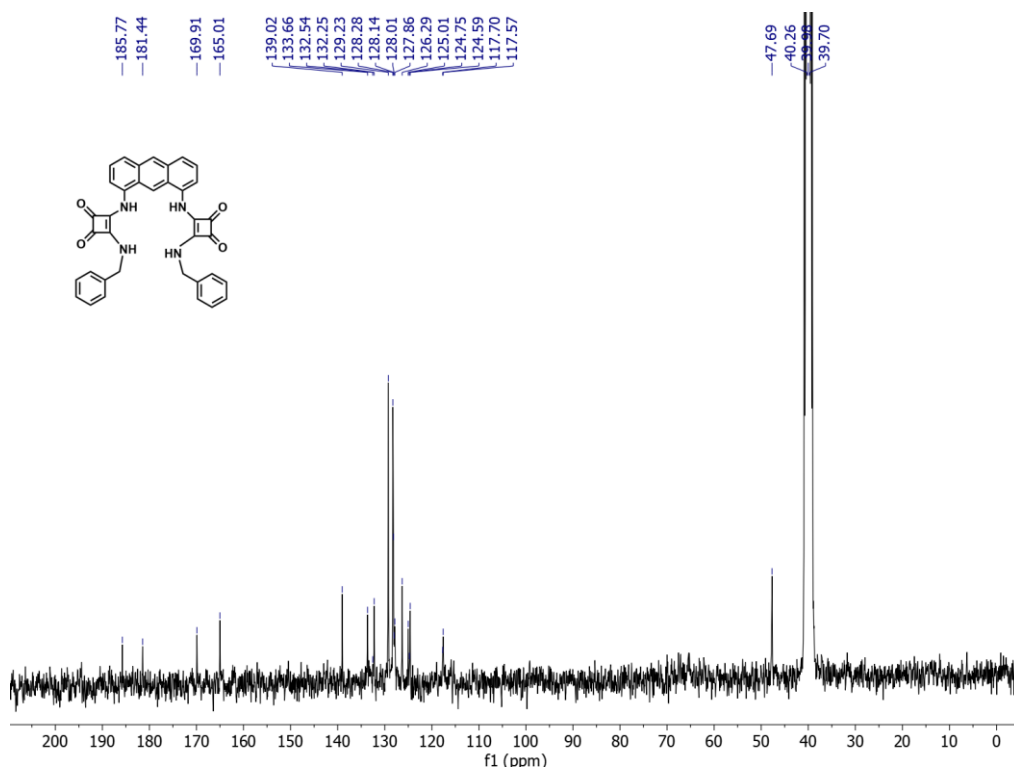

Fig. S6.  $^{13}\text{C}$  NMR spectrum of receptor 2 in DMSO- $d_6$ .

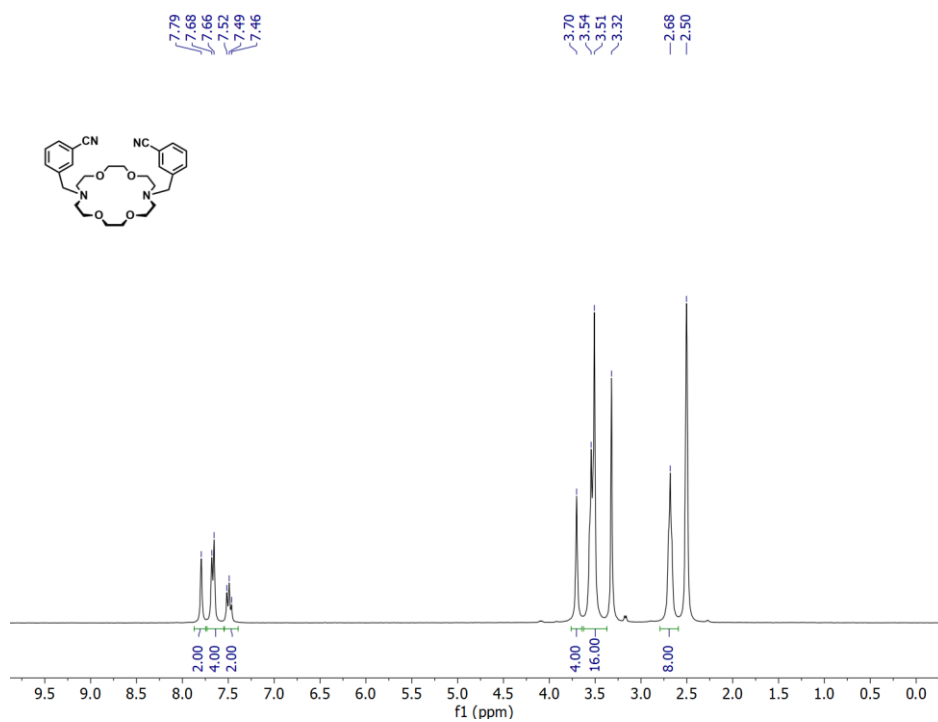

Fig. S7.  $^1\text{H}$  NMR spectrum of receptor 3 in DMSO- $d_6$ .

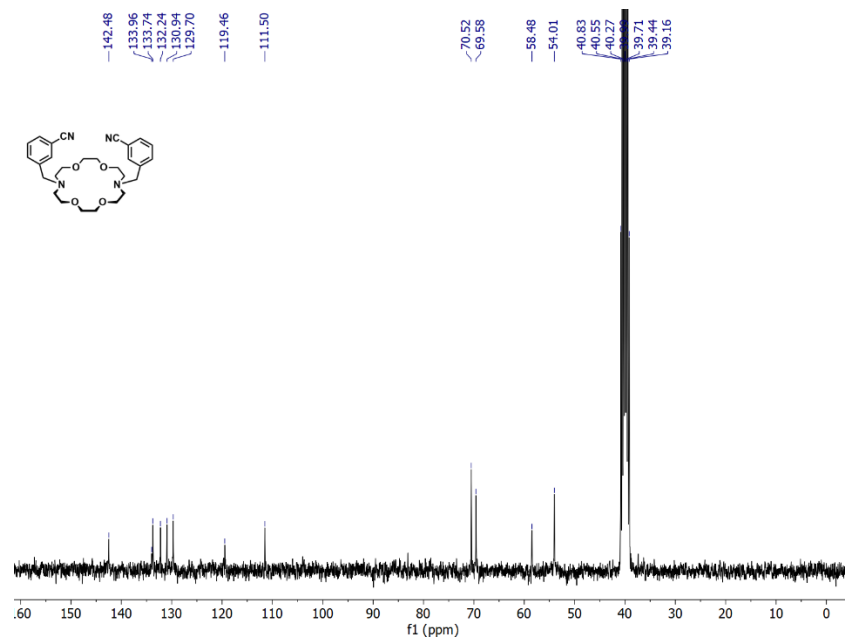

Fig. S8.  $^{13}\text{C}$  NMR spectrum of receptor 2 in  $\text{DMSO-d}_6$ .

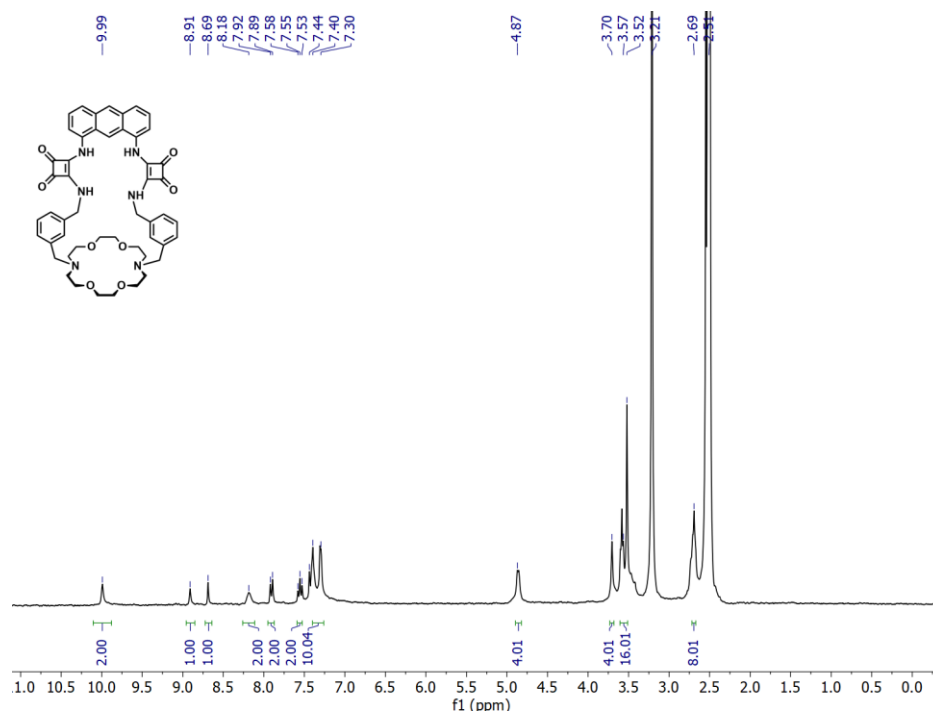

Fig. S9.  $^1\text{H}$  NMR spectrum of receptor 1 in  $\text{DMSO-d}_6$  at a temperature of  $60^\circ\text{C}$ .

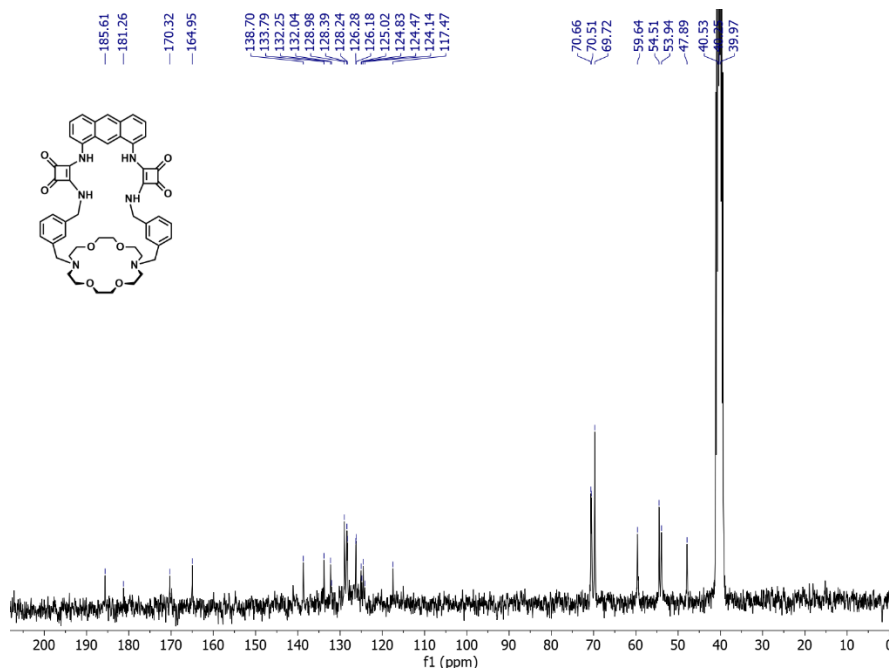

**Fig. S10.** <sup>13</sup>C NMR spectrum of receptor **1** in DMSO-d<sub>6</sub> at a temperature of 60°C.

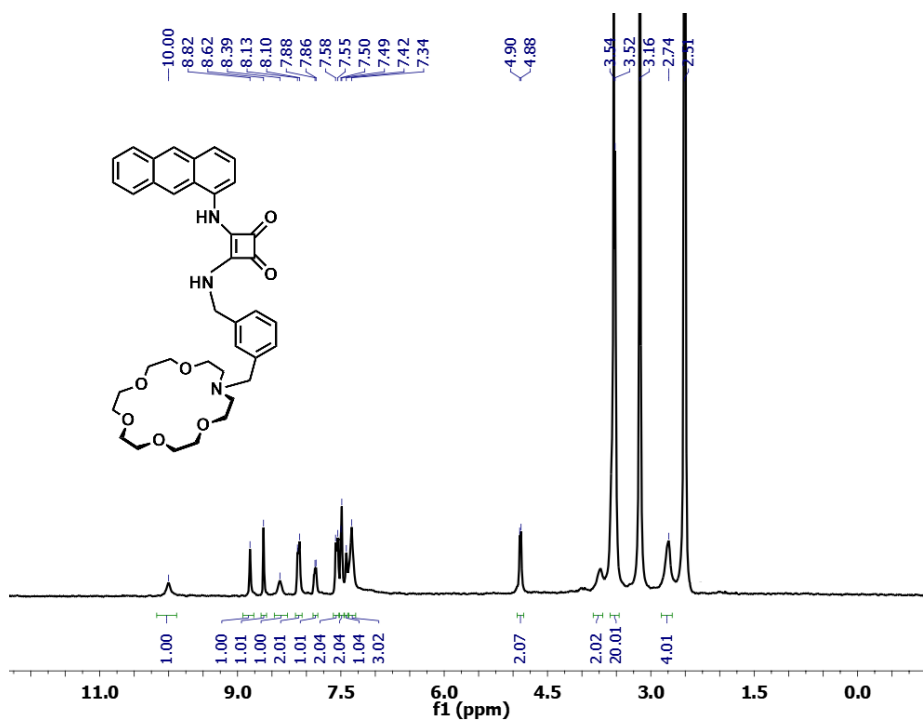

**Fig. S11.** <sup>1</sup>H NMR spectrum of receptor **4** in DMSO-d<sub>6</sub> at a temperature of 60°C.

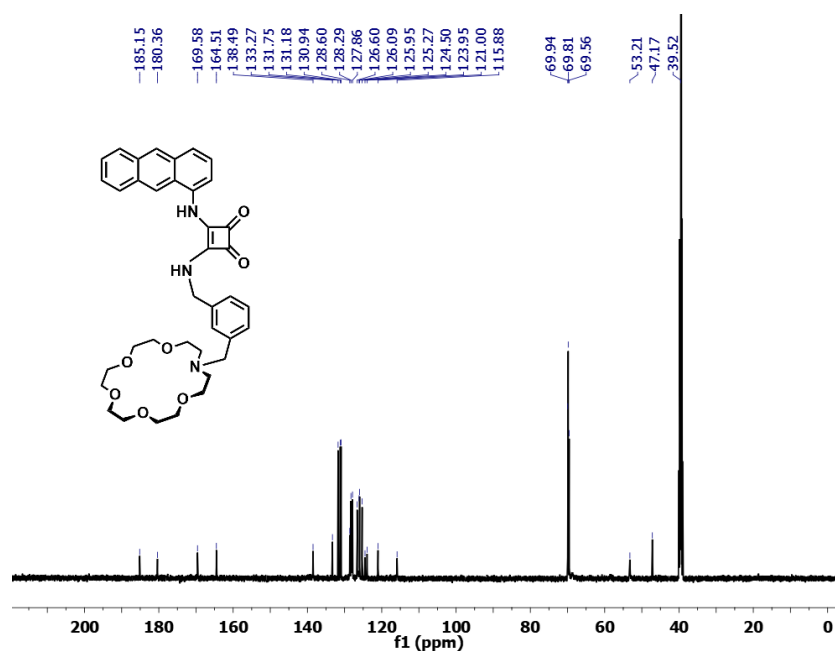

**Fig. S12.**  $^{13}\text{C}$  NMR spectrum of receptor **4** in  $\text{DMSO-d}_6$  at a temperature of  $60^\circ\text{C}$ .

### Crystal data

Single crystal X-ray diffraction of  $1 \times \text{NaBr}$ . The X-ray measurement of  $1 \times \text{NaBr}$  was performed at  $130.0(5)$  K on a Bruker D8 Venture PhotonII diffractometer equipped with a TRIUMPH monochromator and a  $\text{MoK}\alpha$  fine focus sealed tube ( $\lambda = 0.71073 \text{ \AA}$ ). A total of 2397 frames were collected with Bruker APEX3 program. [2] The frames were integrated with the Bruker SAINT software package [3] using a narrow-frame algorithm. The integration of the data using a triclinic unit cell yielded a total of 48819 reflections to a maximum  $\theta$  angle of  $25.05^\circ$  ( $0.84 \text{ \AA}$  resolution), of which 8369 were independent (average redundancy 5.833, completeness = 99.9%,  $R_{\text{int}} = 3.88\%$ ,  $R_{\text{sig}} = 2.92\%$ ) and 6920 (82.69%) were greater than  $2\sigma(F_2)$ . The final cell constants of  $a = 9.2134(5) \text{ \AA}$ ,  $b = 13.8879(8) \text{ \AA}$ ,  $c = 19.1338(11) \text{ \AA}$ ,  $\alpha = 90.438(2)^\circ$ ,  $\beta = 102.358(2)^\circ$ ,  $\gamma = 97.765(2)^\circ$ ,  $V = 2367.9(2) \text{ \AA}^3$ , are based upon the refinement of the XYZ-centroids of 9906 reflections above  $20 \sigma(I)$  with  $5.176^\circ < 2\theta < 50.13^\circ$ . Data were corrected for absorption effects using the Multi-Scan method. [4] The ratio of minimum to maximum apparent transmission was 0.917. The calculated minimum and maximum transmission coefficients (based on crystal size) are 0.762 and 0.966.

The structure was solved and refined using SHELXTL Software Package [5,6] using the space group  $P\bar{1}$ , with  $Z = 1$  for the formula unit,  $\text{C}_{104}\text{H}_{114}\text{Br}_2\text{N}_{12}\text{Na}_2\text{O}_{17}$  corresponding to:  $2 \times \text{C}_{50}\text{H}_{52}\text{N}_6\text{O}_8 + 2 \times \text{NaBr} + \text{Et}_2\text{O}$ . The final anisotropic full-matrix least-squares refinement on

F2 with 663 variables converged at R1 = 3.28%, for the observed data and R2 = 8.66% for all data. The goodness-of-fit was 1.037. The largest peak in the final difference electron density synthesis was 0.480 e-/Å<sup>3</sup> and the largest hole was -0.246 e-/Å<sup>3</sup> with an RMS deviation of 0.047 e-/Å<sup>3</sup>. Based on the final model, the calculated density was 1.409 g/cm<sup>3</sup> and F(000), 1050 e-. The details concerning the crystal data and structural parameters of 3+NaBr are collected in Table S1.

The crystal contains disordered Et<sub>2</sub>O molecule. The solvent is located on the centre of symmetry and occupies two alternative positions with fixed ratio of 0.5:0.5. Br anion coordinated by two squaramide units of the macrocycle is disordered over two positions with refined occupancy ratio yielding 0.946(4):0.054(4). All but one non-hydrogen atom (including those in the disordered Et<sub>2</sub>O molecule) were refined anisotropically, low occupancy position of disordered Br- anion was refined isotropically. Most of the hydrogen atoms were placed in calculated positions and refined within the riding model. Four H atoms engaged in hydrogen bonds were freely refined together with their isotropic temperature factors. To preserve reasonable geometry of the disordered solvent molecule number of distance, angle and ADP restraints were used. The temperature factors of all constraint hydrogen atoms were not refined and were set to be 1.2 or 1.5 times larger than U<sub>eq</sub> of the corresponding heavy atom. The atomic scattering factors were taken from the International Tables. [7] Molecular graphics were prepared using the program Mercury 2020.3.0. [8] Thermal ellipsoids parameters are presented at a 50% probability level in Figure S13.

Single crystal X-ray diffraction of **1**×CH<sub>3</sub>COOH. The X-ray measurement of **1**×CH<sub>3</sub>COOH was performed at 130.0(5) K on a Bruker D8 Venture PhotonII diffractometer equipped with a INCOATEC IμS micro-focus source (λ = 1.54178 Å) and a mirror monochromator. A total of 1416 frames were collected with Bruker APEX3 program [1]. The frames were integrated with the Bruker SAINT software package [3] using a narrow-frame algorithm. The integration of the data using a monoclinic unit cell yielded a total of 14460 reflections to a maximum θ angle of 36.39° (1.30 Å resolution), of which 2591 were independent (average redundancy 5.581, completeness = 99.7%, R<sub>int</sub> = 13.90%, R<sub>sig</sub> = 12.15%) and 1544 (59.59%) were greater than 2σ(F<sub>2</sub>). The final cell constants of a = 17.319(2) Å, b = 12.8227(16) Å, c = 24.862(3) Å, β = 99.564(5)°, V = 5444.5(12) Å<sup>3</sup>, are based upon the refinement of the XYZ-centroids of 2203 reflections above 20 σ(I) with 7.212° < 2θ < 72.51°. Data were corrected for absorption effects using the Multi-Scan method [4]. The ratio of minimum to maximum apparent transmission

was 0.780. The calculated minimum and maximum transmission coefficients (based on crystal size) are 0.793 and 0.993.

The structure was solved and refined using SHELXTL Software Package [5,6] using the space group P21/c, with Z = 4 for the formula unit, C<sub>56</sub>H<sub>63</sub>KN<sub>8</sub>O<sub>11</sub> corresponding to C<sub>50</sub>H<sub>52</sub>N<sub>6</sub>O<sub>8</sub> + CH<sub>3</sub>COOK + H<sub>2</sub>O + 2 × MeCN. The final anisotropic full-matrix least-squares refinement on F<sup>2</sup> with 376 variables converged at R1 = 9.02%, for the observed data and wR2 = 22.41% for all data. The goodness-of-fit was 1.099. The largest peak in the final difference electron density synthesis was 0.361 e-/Å<sup>3</sup> and the largest hole was -0.304 e-/Å<sup>3</sup> with an RMS deviation of 0.060 e-/Å<sup>3</sup>. Based on the final model, the calculated density was 1.297 g/cm<sup>3</sup> and F(000), 2248 e-. The details concerning the crystal data and structural parameters of **1**+CH<sub>3</sub>COOH are collected in Table S1.

The investigated compound crystallizes very hardly and the crystals are very small, thus it was possible to collect data up to 1.3 Å resolution only. Because of weak scattering power and small number of reflection most atoms in the structure was refined isotropically. Only K and O atoms were refined anisotropically with restraints for more spherical shape in case of some oxygen atoms. Hydrogen atoms of the methyl group in the acetate anion are disordered over two positions with refined occupancy ratio yielding 0.61(22):0.39(22). Most hydrogen atoms were placed in calculated positions and refined within the riding model. H atoms engaged in hydrogen bonds (N-H, O-H) were refined. To preserve reasonable geometry of H<sub>2</sub>O molecule number of distance and angle restraints were used. The temperature factors of hydrogen atoms were not refined and were set to be 1.2 or 1.5 times larger than U<sub>eq</sub> of the corresponding heavy atom. The atomic scattering factors were taken from the International Tables. [7] Molecular graphics was prepared using program Mercury 2020.3.0. [8] Thermal ellipsoids parameters are presented at a 50% probability level in Figure S14. The structures are deposited in Cambridge Structural Database under the numbers **CCDC 2323921-2323922** for the **1**×NaBr and **1**×CH<sub>3</sub>COOK complexes respectively. The structures can be obtained free of charge from The CCDC via [www.ccdc.cam.ac.uk/structures](http://www.ccdc.cam.ac.uk/structures).

| Identification code                      | <b>1</b> ×NaBr                                                                                                                                                                                               | <b>1</b> ×CH <sub>3</sub> COOK                                                                                                                                                               |
|------------------------------------------|--------------------------------------------------------------------------------------------------------------------------------------------------------------------------------------------------------------|----------------------------------------------------------------------------------------------------------------------------------------------------------------------------------------------|
| <b>Formula</b>                           | C <sub>104</sub> H <sub>114</sub> Br <sub>2</sub> N <sub>12</sub> Na <sub>2</sub> O <sub>17</sub><br><br>2 × C <sub>50</sub> H <sub>52</sub> N <sub>6</sub> O <sub>8</sub> +<br>2 × NaBr + Et <sub>2</sub> O | C <sub>56</sub> H <sub>63</sub> KN <sub>8</sub> O <sub>11</sub><br><br>C <sub>50</sub> H <sub>52</sub> N <sub>6</sub> O <sub>8</sub> + CH <sub>3</sub> COOK +<br>H <sub>2</sub> O + 2 × MeCN |
| <b>M<sub>x</sub>/ g mol<sup>-1</sup></b> | 702.86                                                                                                                                                                                                       | 1063.24                                                                                                                                                                                      |
| <b>T/ K</b>                              | 130.5(5)                                                                                                                                                                                                     | 130.5(5)                                                                                                                                                                                     |

|                                       |                                                                                                                                                                                     |                                                                                                                       |
|---------------------------------------|-------------------------------------------------------------------------------------------------------------------------------------------------------------------------------------|-----------------------------------------------------------------------------------------------------------------------|
| $\lambda / \text{\AA}$                | 0.71073                                                                                                                                                                             | 1.54178                                                                                                               |
| Crystal size                          | 0.037 × 0.073 × 0.306 mm                                                                                                                                                            | 0.005 × 0.012 × 0.172 mm                                                                                              |
| Crystal habit                         | yellow needle                                                                                                                                                                       | yellow needle                                                                                                         |
| Space group                           | $P\bar{1}$                                                                                                                                                                          | $P2_1/c$                                                                                                              |
| Unit cell dimensions                  | $a = 9.2134(5) \text{\AA}$<br>$b = 13.8879(8) \text{\AA}$<br>$c = 19.1338(11) \text{\AA}$<br>$\alpha = 90.438(2)^\circ$<br>$\beta = 102.358(2)^\circ$<br>$\gamma = 97.765(2)^\circ$ | $a = 17.319(2) \text{\AA}$<br>$b = 12.8227(16) \text{\AA}$<br>$c = 24.862(3) \text{\AA}$<br>$\beta = 99.564(5)^\circ$ |
| $V / \text{\AA}^3, Z$                 | 2367.9(2), 1                                                                                                                                                                        | 5444.5(12), 4                                                                                                         |
| $D_x / \text{g cm}^{-3}$              | 1.409                                                                                                                                                                               | 1.297                                                                                                                 |
| $\mu / \text{mm}^{-1}$                | 0.941                                                                                                                                                                               | 1.411                                                                                                                 |
| $F(000)$                              | 1050                                                                                                                                                                                | 2248                                                                                                                  |
| $\vartheta_{min}, \vartheta_{max}$    | 2.54°, 25.05°                                                                                                                                                                       | 2.59°, 36.39°                                                                                                         |
| Index ranges                          | -10 ≤ $h$ ≤ 10<br>-16 ≤ $k$ ≤ 16<br>-22 ≤ $l$ ≤ 22                                                                                                                                  | -13 ≤ $h$ ≤ 13<br>-9 ≤ $k$ ≤ 9<br>-19 ≤ $l$ ≤ 19                                                                      |
| Reflections collected/<br>independent | 48819/ 8369 ( $R_{int} = 0.0388$ )                                                                                                                                                  | 14460/ 2591 ( $R_{int} = 0.1390$ )                                                                                    |
| Completeness                          | 99.9%                                                                                                                                                                               | 99.7%                                                                                                                 |
| Absorption correction                 | Multi-Scan                                                                                                                                                                          | Multi-Scan                                                                                                            |
| $T_{max}, T_{min}$                    | 0.966, 0.762                                                                                                                                                                        | 0.993, 0.793                                                                                                          |
| Refinement method                     | Full-matrix LSQ on $F^2$                                                                                                                                                            | Full-matrix LSQ on $F^2$                                                                                              |
| Data / restraints / parameters        | 8369 / 36 / 663                                                                                                                                                                     | 2591 / 21 / 376                                                                                                       |
| GOF on $F^2$                          | 1.037                                                                                                                                                                               | 1.099                                                                                                                 |
| Final $R$ indices                     | 6920 data; $l > 2\sigma(l)$<br>$R1 = 0.0328, wR2 = 0.0803$<br>all data<br>$R1 = 0.0448, wR2 = 0.0866$                                                                               | 1544 data; $l > 2\sigma(l)$<br>$R1 = 0.0902, wR2 = 0.1938$<br>all data<br>$R1 = 0.1547, wR2 = 0.2241$                 |
| Extinction coefficient                | -                                                                                                                                                                                   | 0.0008(1)                                                                                                             |
| $\Delta\rho_{max}, \Delta\rho_{min}$  | 0.480 e $\text{\AA}^{-3}$ , -0.246 e $\text{\AA}^{-3}$                                                                                                                              | 0.361 e $\text{\AA}^{-3}$ , -0.304 e $\text{\AA}^{-3}$                                                                |

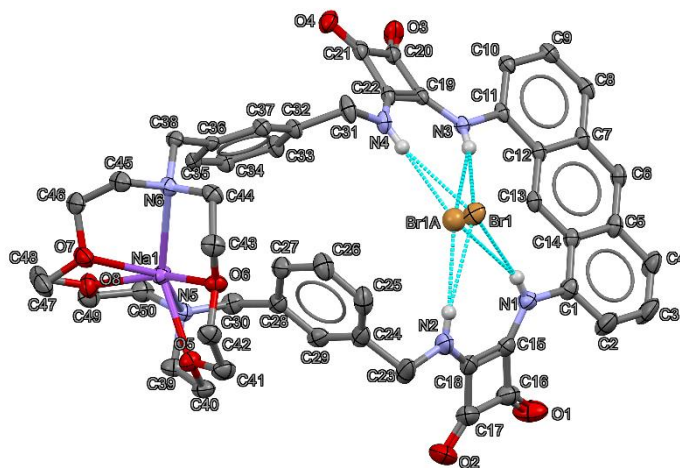



**Fig S13.** Thermal ellipsoid plot of the  $1 \times \text{NaBr}$  at 50% probability level together with numbering scheme. Disordered  $\text{Et}_2\text{O}$  molecule and hydrogen atoms omitted for clarity.

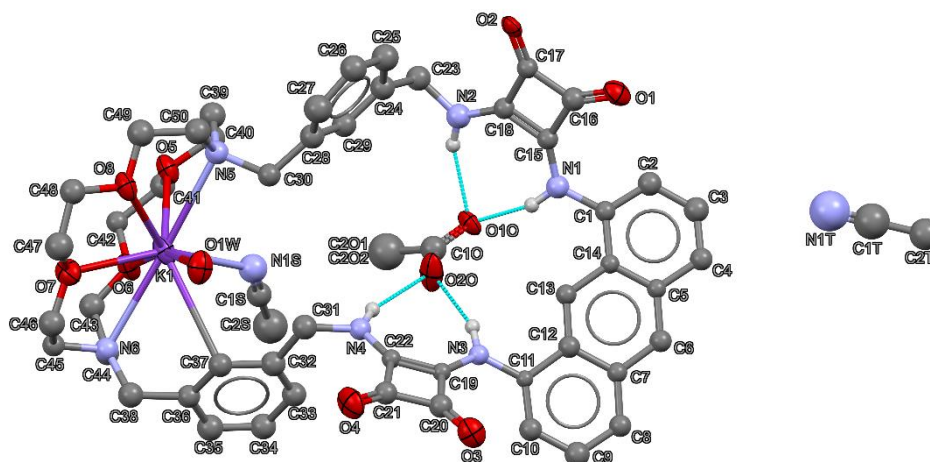

**Fig S14.** Thermal ellipsoid plot of the  $1 \times \text{CH}_3\text{COOK}$  at 50% probability level together with numbering scheme. Hydrogen atoms were omitted for clarity.

### NMR titration experiments

The  $^1\text{H}$  NMR titration was conducted at  $60^\circ\text{C}$  in  $\text{DMSO-d}_6$ . In each case, a  $500 \mu\text{L}$  of freshly prepared solution of receptor **1**, **2** or **4** ( $3.5 \text{ mM}$  of **1**;  $2.48 \text{ mM}$  of **2**,  $3.88 \text{ mM}$  of **4**) was added to a  $5 \text{ mm}$  NMR tube. In the case of ion pair titration receptor was firstly pretreated with one or three equivalents of  $\text{KPF}_6$ ,  $\text{NaClO}_4$  or  $\text{NH}_4\text{PF}_6$ . Then small aliquots of solution of TBACl, containing receptor at constant concentration, were added and a spectrum was acquired after each addition. The resulting titration data were analyzed using BindFit (v0.5) package, available online at <http://supramolecular.org> (27.11.2023). Each titration was carried out in duplicate. Reported values are calculated as weighted arithmetic mean, where the weights were the errors obtained for each value separately. The given uncertainty of the association constants is the largest of the variance (external or internal).

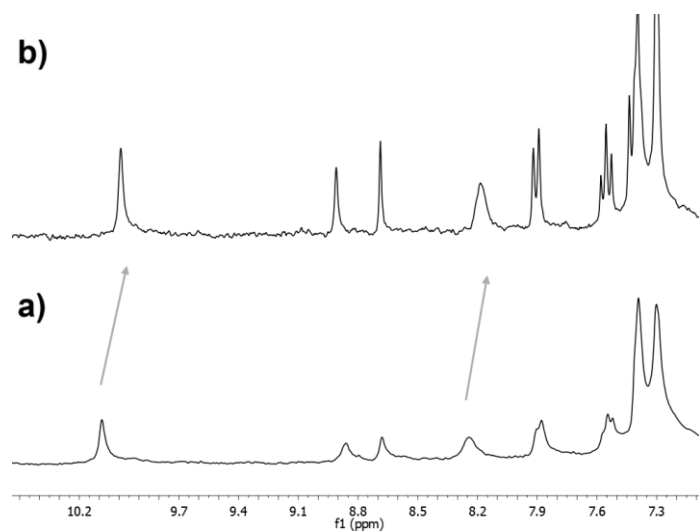

**Fig. S15.** Partial  $^1\text{H}$ NMR spectra of receptor **1** (2.0 mM) in  $\text{DMSO-d}_6$  recorded (a) at 25°C and (b) at 60°C (signals corresponding to squaramides and phenyl protons).

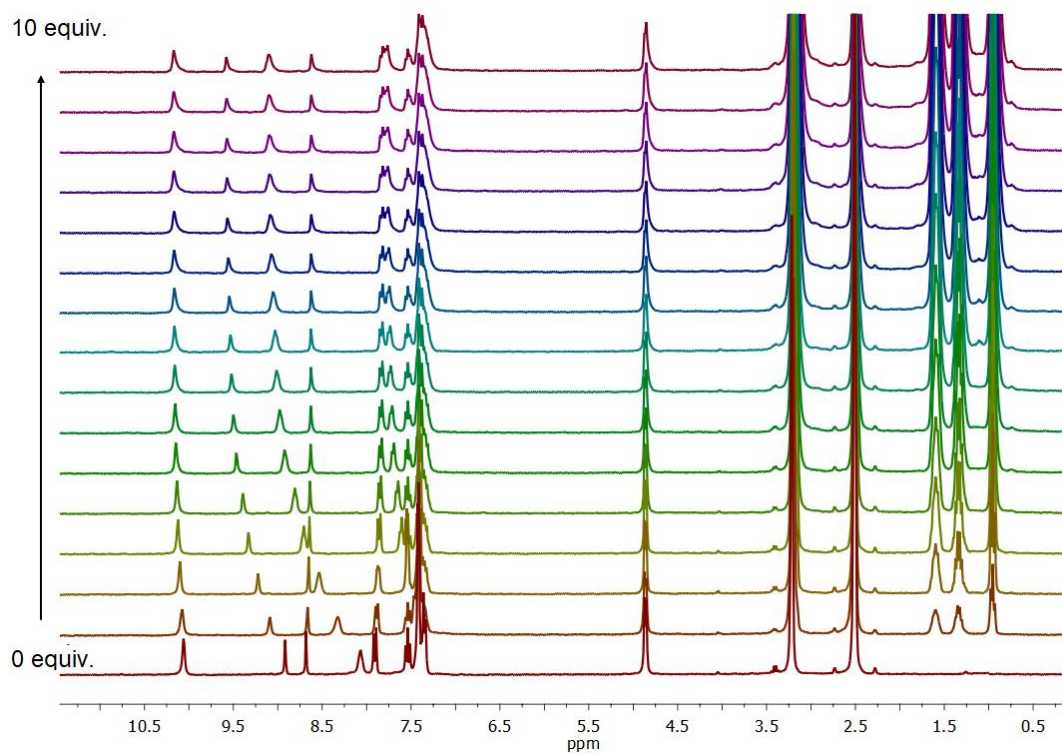

**Fig. S16.** Typical  $^1\text{H}$  NMR spectra recorded upon titration of receptor **2** in  $\text{DMSO-d}_6$  with TBACl at a temperature of 60°C.

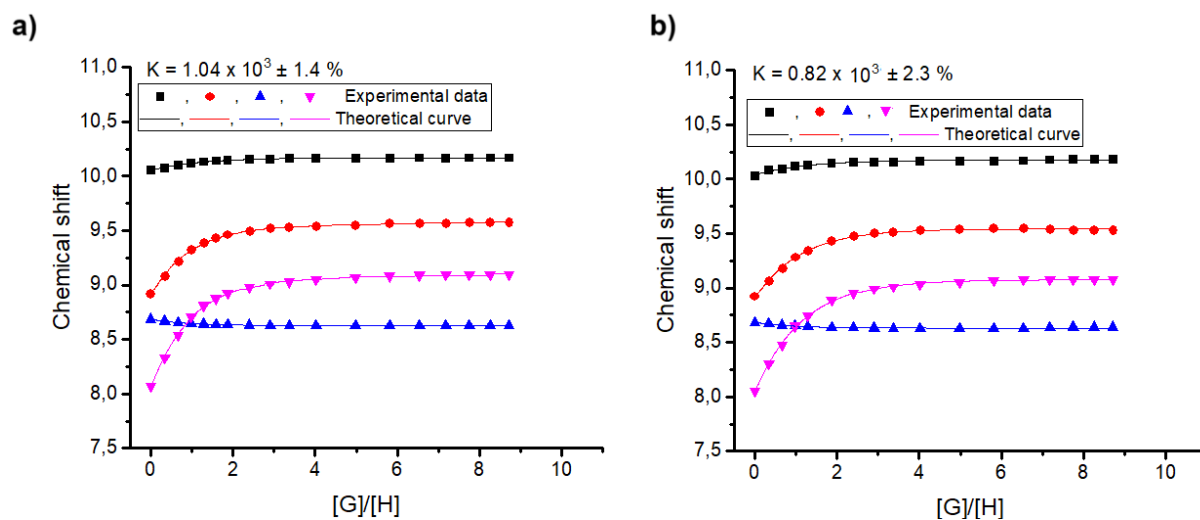

**Fig. S17.**  $^1\text{H}$  NMR titration binding isotherms of receptor **2** in  $\text{DMSO-d}_6$  upon addition of increasing amounts of TBACl (a) and of TBACl in the presence of 1 equiv.  $\text{NaClO}_4$  (b).

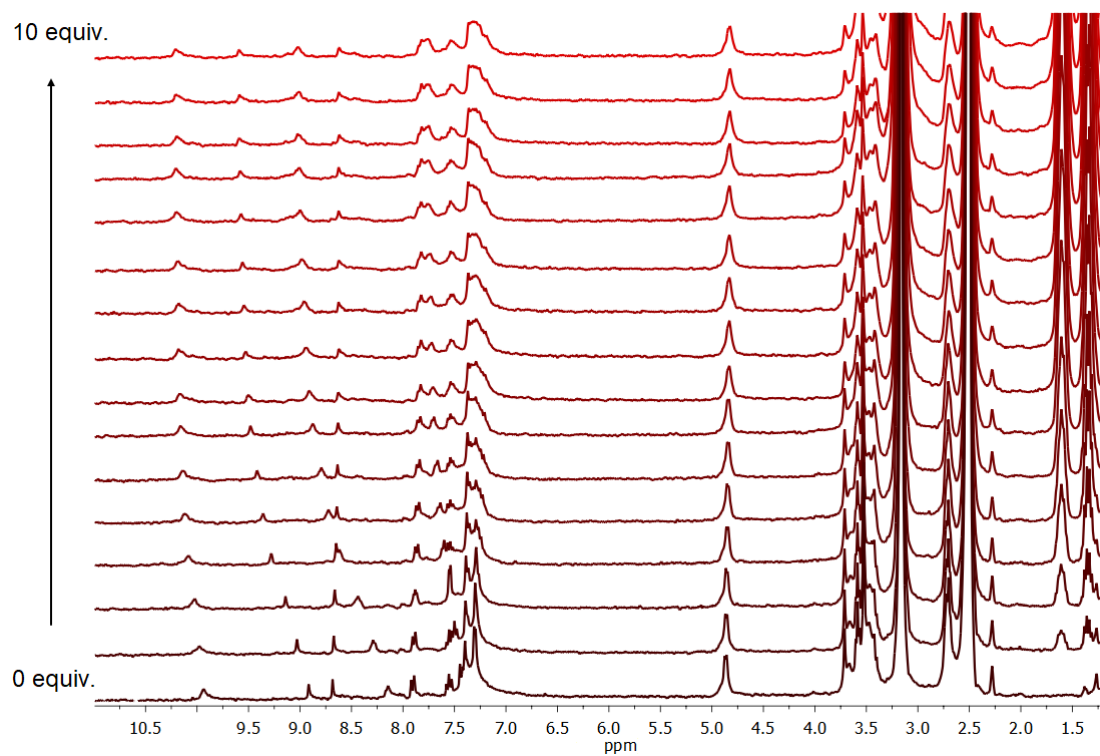

**Fig. S18.** Typical  $^1\text{H}$  NMR spectra recorded upon titration of receptor **1** in  $\text{DMSO-d}_6$  with TBACl at a temperature of  $60^\circ\text{C}$ .

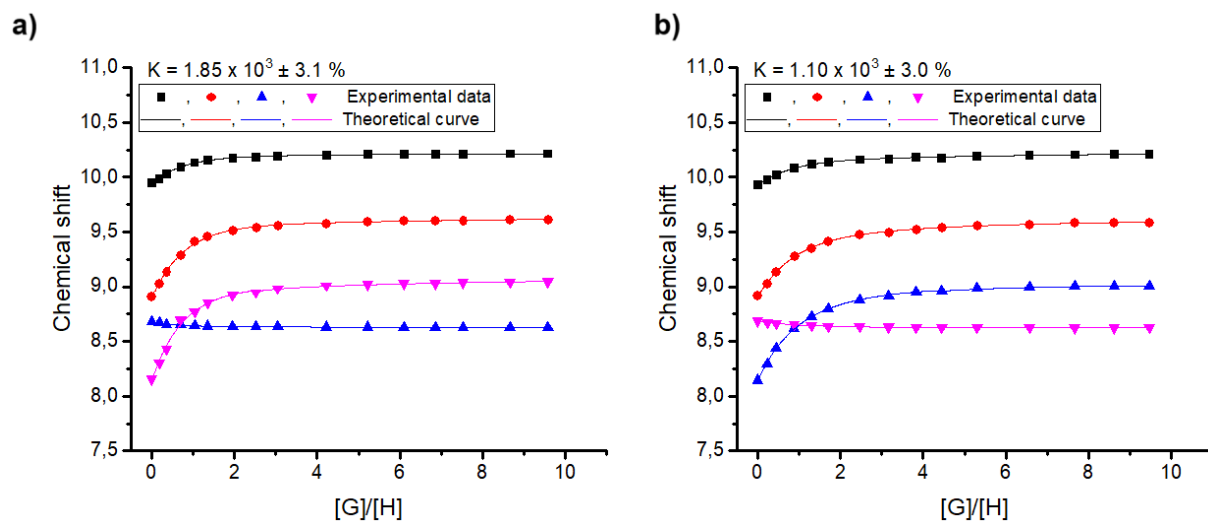

**Fig. S19.**  $^1\text{H}$  NMR titration binding isotherms of receptor **1** in  $\text{DMSO-d}_6$  upon addition of increasing amounts of TBACl (a) and of TBACl in the presence of 1 equiv.  $\text{NaClO}_4$  (b).

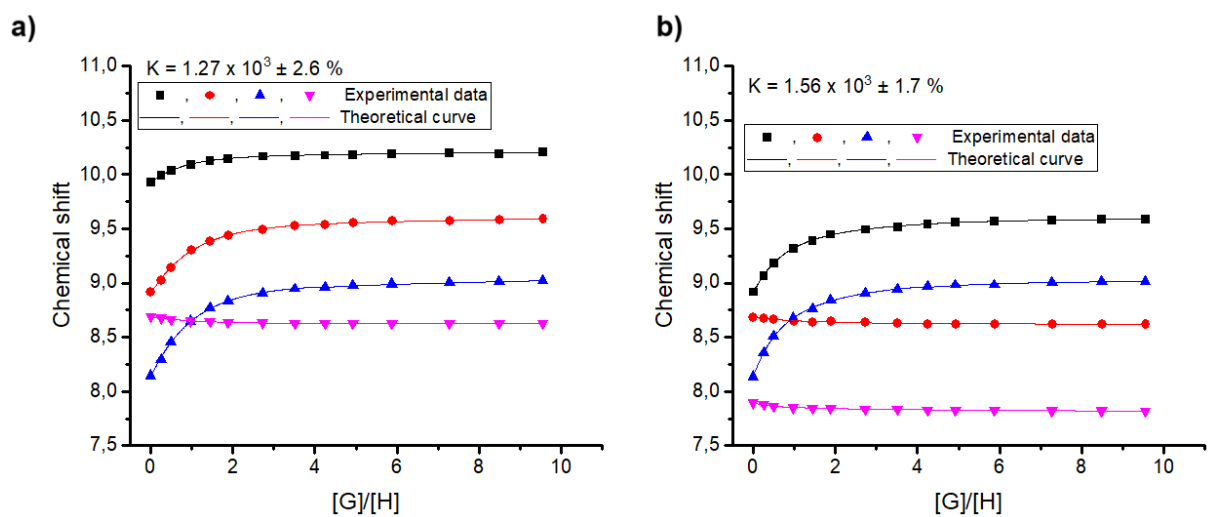

**Fig. S20.**  $^1\text{H}$  NMR titration binding isotherms of receptor **1** in  $\text{DMSO-d}_6$  upon addition of increasing amounts of TBACl in the presence of 1 equiv.  $\text{KPF}_6$  (a) and of TBACl in the presence of 1 equiv.  $\text{NH}_4\text{PF}_6$  (b).

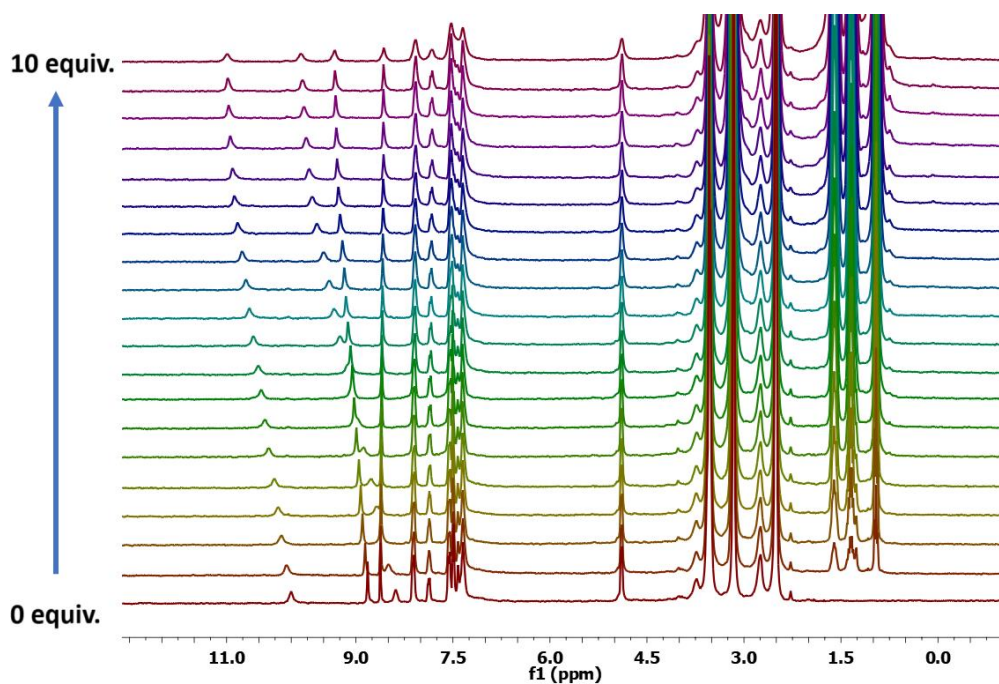

**Fig. S21.** Typical  $^1\text{H}$  NMR spectra recorded upon titration of receptor **4** in  $\text{DMSO-d}_6$  with TBACl at a temperature of  $60^\circ\text{C}$ .

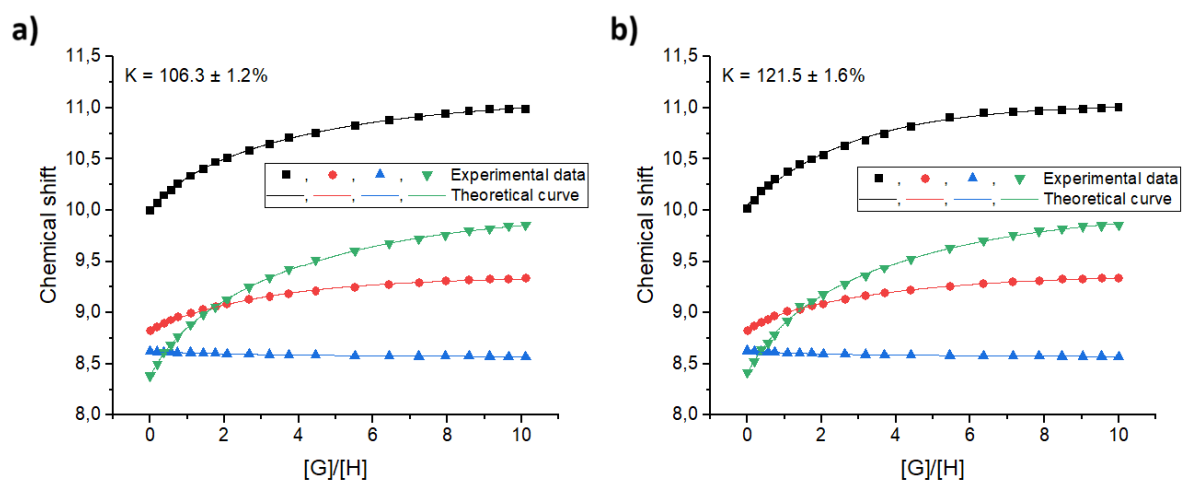

**Fig. S22.**  $^1\text{H}$  NMR titration binding isotherms of receptor **4** in  $\text{DMSO-d}_6$  upon addition of increasing amounts of TBACl (a) and of TBACl in the presence of 1 equiv.  $\text{KPF}_6$  (b).

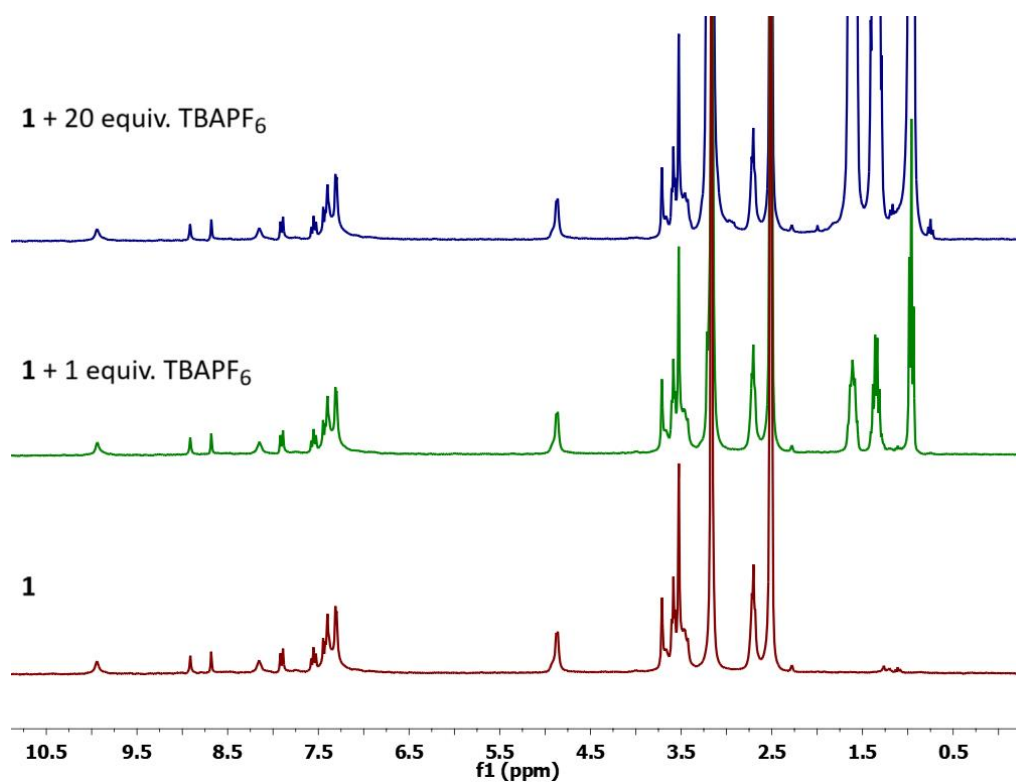

**Fig. S23.**  $^1\text{H}$ NMR spectra of receptor **1** (2.0 mM) in  $\text{DMSO-d}_6$  (60°C) and (b) after adding 1 or 20 equiv. of  $\text{TBAPF}_6$ .

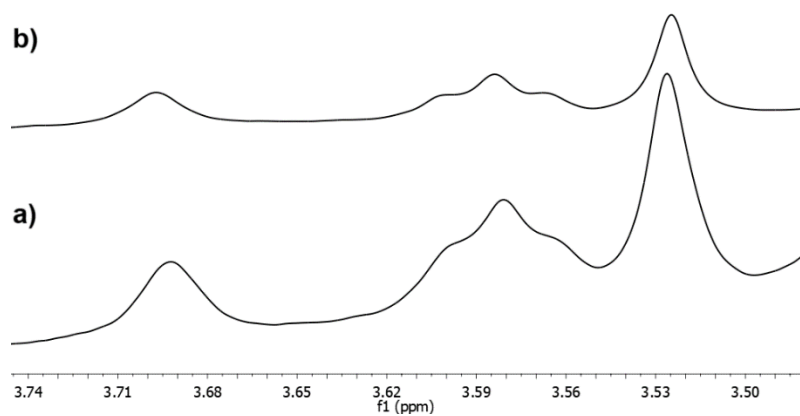

**Fig. S24.** Partial  $^1\text{H}$ NMR spectra (a) of receptor **1** (2.0 mM) in  $\text{DMSO-d}_6$  (60°C) and (b) upon addition 1 equiv.  $\text{KPF}_6$  (signals corresponding to crown ether).



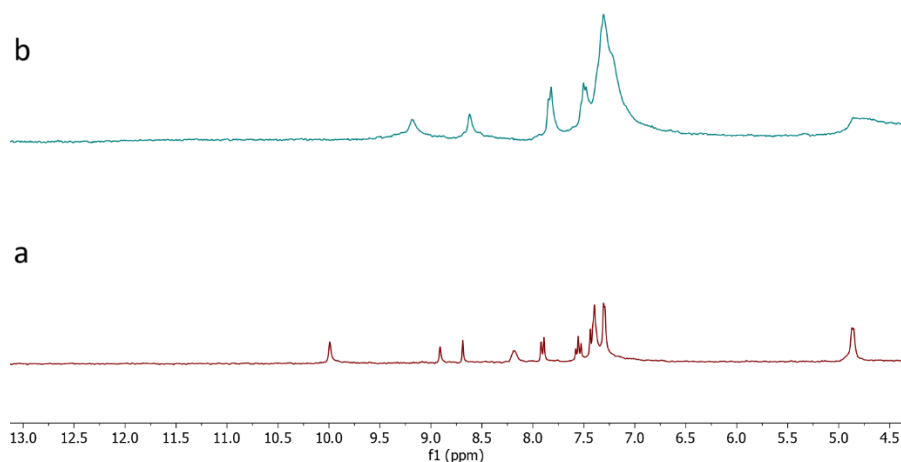

**Fig. S25.** Partial  $^1\text{H}$ NMR spectra (a) of receptor **1** (2.0 mM) in  $\text{DMSO-d}_6$  ( $60^\circ\text{C}$ ) and (b) after SLE with 5-AVA (signals corresponding to squaramide and aromatic).

The  $^1\text{H}$  NMR titration was conducted at 298K in  $\text{CD}_3\text{CN}$ . In each case, 500  $\mu\text{L}$  of freshly prepared solution of receptor **1** or **2** (2.0 mM of **1**; 1.7 mM of receptor **2**) was added to a 5 mm NMR tube, then small aliquots of solution of TBACl or  $\text{TBACOOCH}_3$ , containing receptor at constant concentration, were added and a spectrum was acquired after each addition.

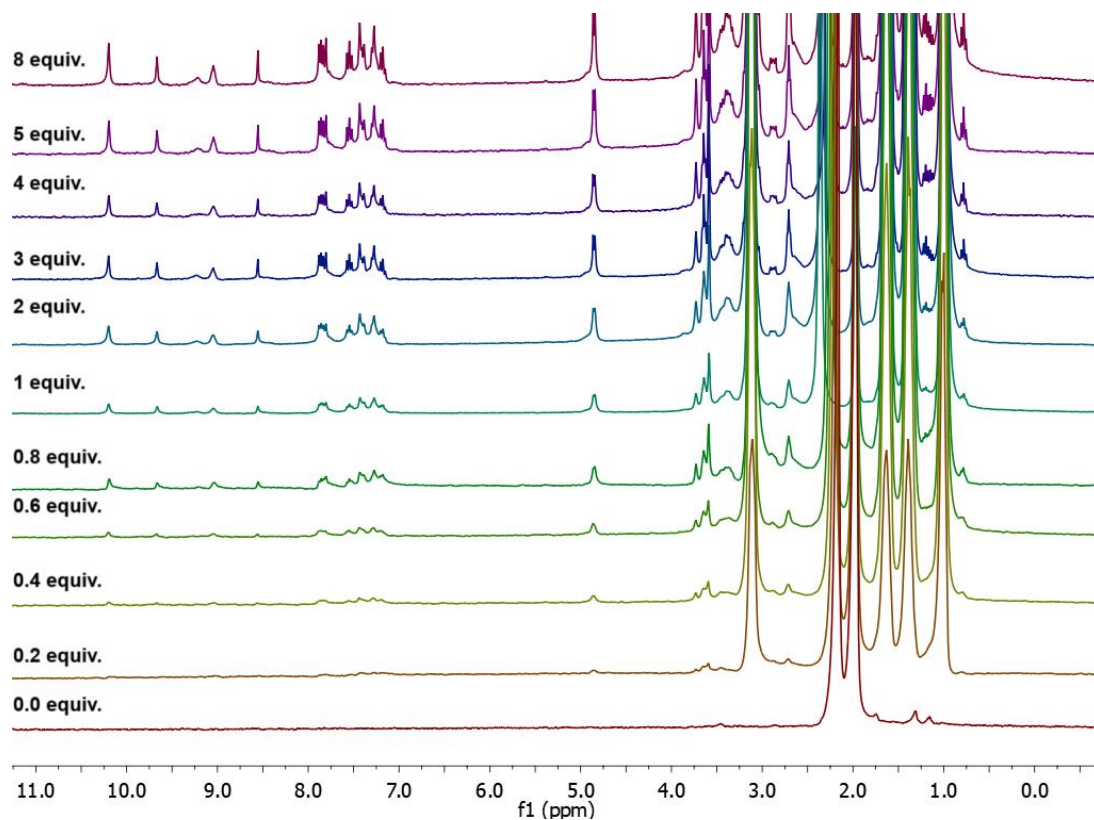

**Fig. 26.**  $^1\text{H}$  NMR spectra recorded upon titration of receptor **1** in  $\text{CD}_3\text{CN}$  with TBACl.

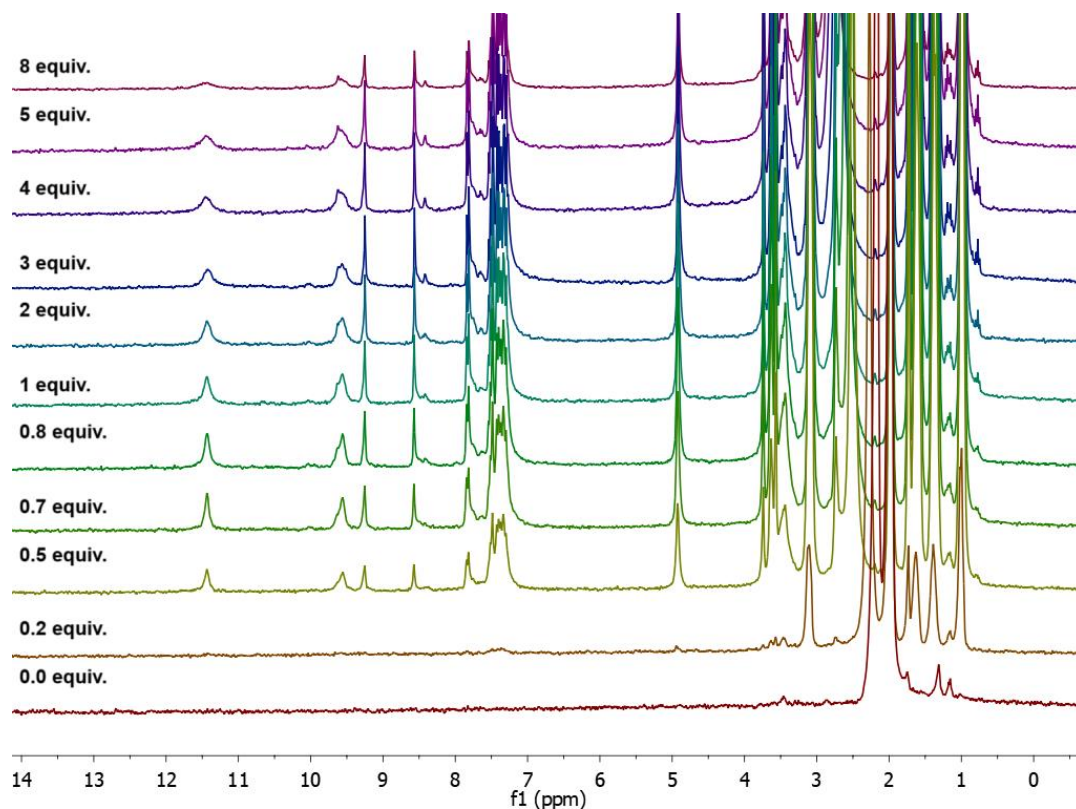

**Fig. 27.**  $^1\text{H}$  NMR spectra recorded upon titration of receptor **1** in  $\text{CD}_3\text{CN}$  with TBACOOCH<sub>3</sub>.

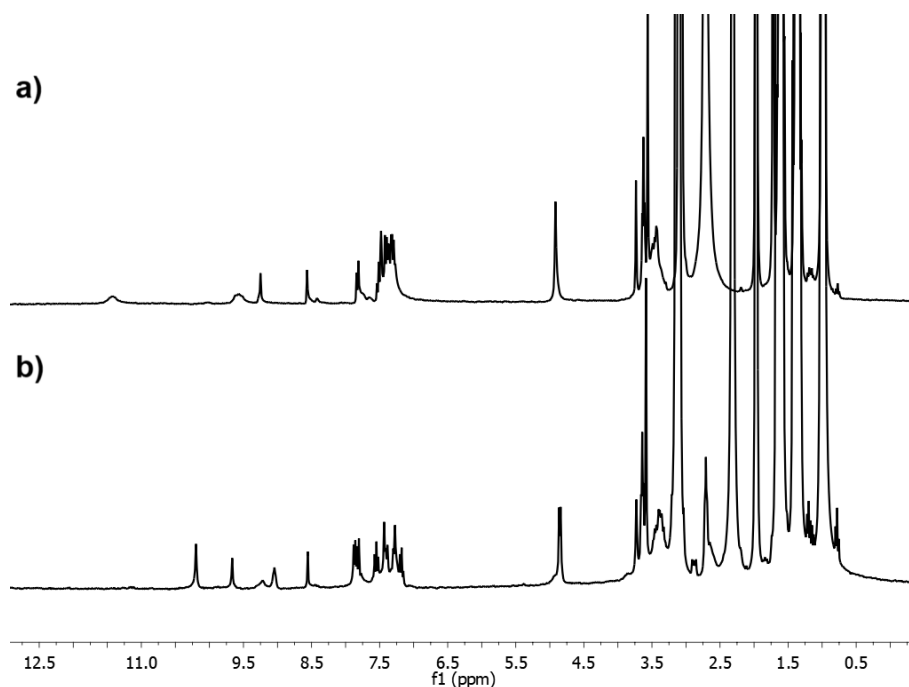

**Fig. S28.**  $^1\text{H}$  NMR spectra (a) of receptor **1** after the addition of 3 equiv. TBACH<sub>3</sub>COO and (b) after the addition of 3 equiv. TBACl.



## 2D spectra

### Mechanochemical encapsulation

Cryptand **1** (0.01 mmol, 0.01 g) and amino acid (0.05 mmol) were placed in a milling jar (3 mL volume) with 2 agate balls ( $\varnothing=4$  mm). The milling process using a Specamill™ small grinding lasted for 1 h. The ball-milled sample was dissolved in acetonitrile, and the undissolved residue was filtered using a syringe filter. The filtrate was subjected to NMR analysis.

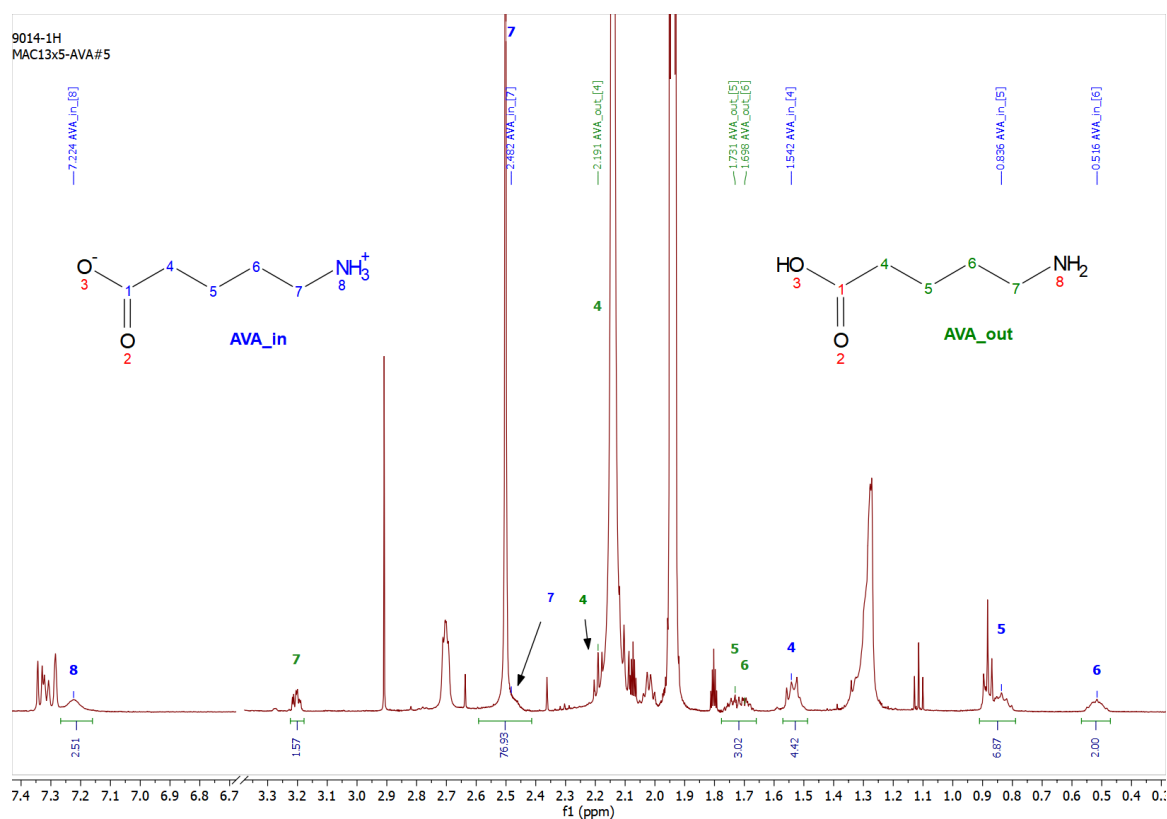

**Fig. S29.**  $^1\text{H}$  NMR spectrum of **1** $\times$ **5**-AVA in  $\text{CD}_3\text{CN}$ .

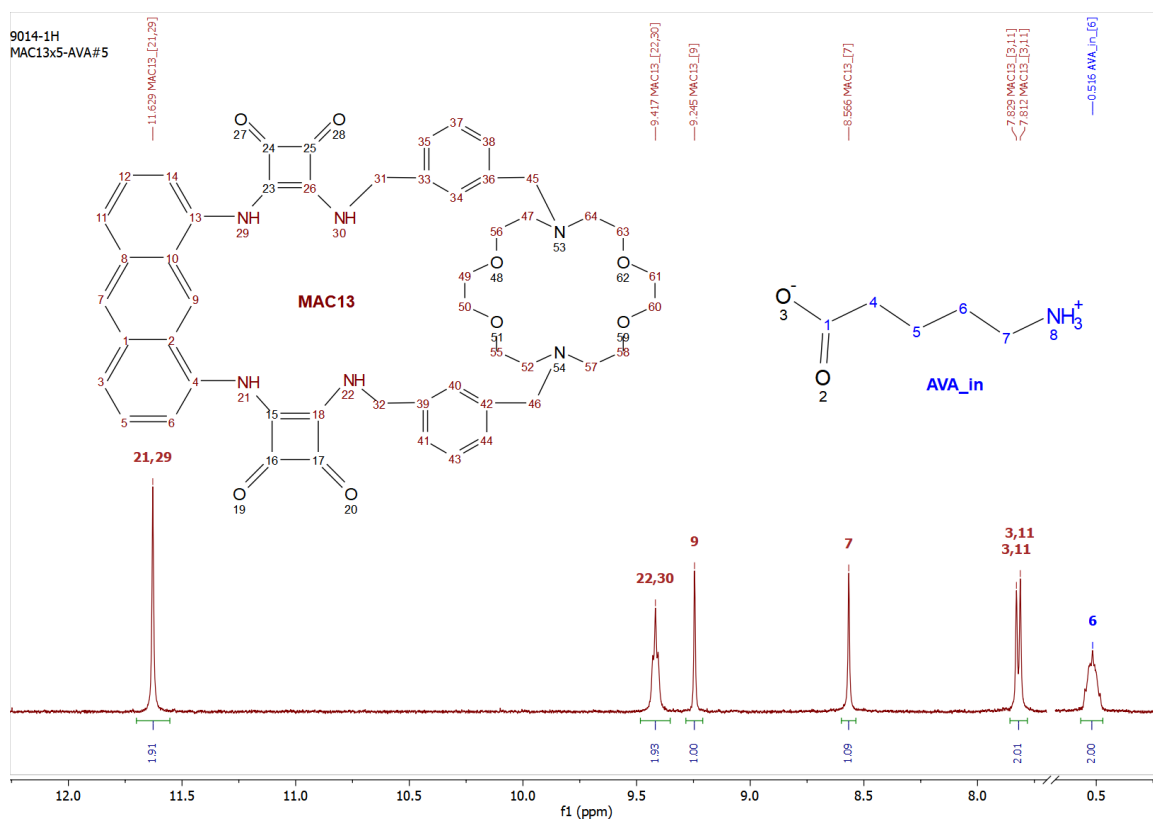

Fig. S30.  $^1\text{H}$  NMR spectrum of  $1\times 5$ -AVA in  $\text{CD}_3\text{CN}$ .

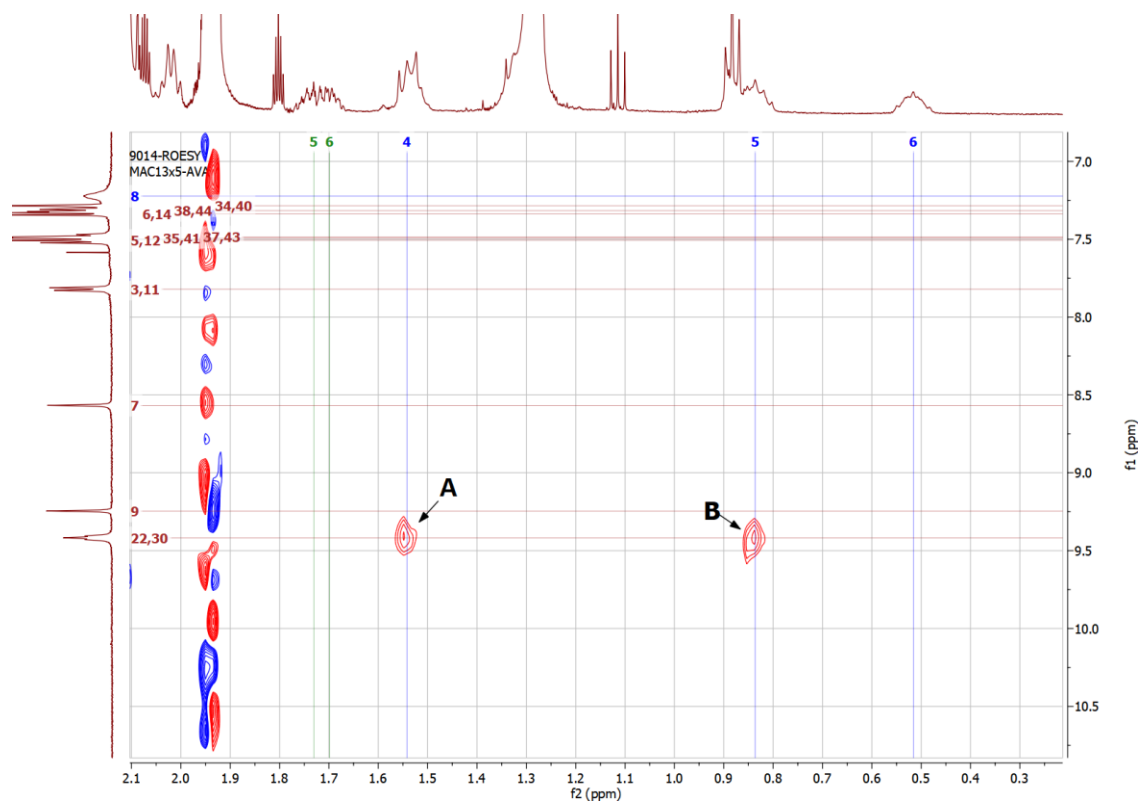

Fig. S31. ROESY NMR spectrum of  $1\times 5$ -AVA in  $\text{CD}_3\text{CN}$ .

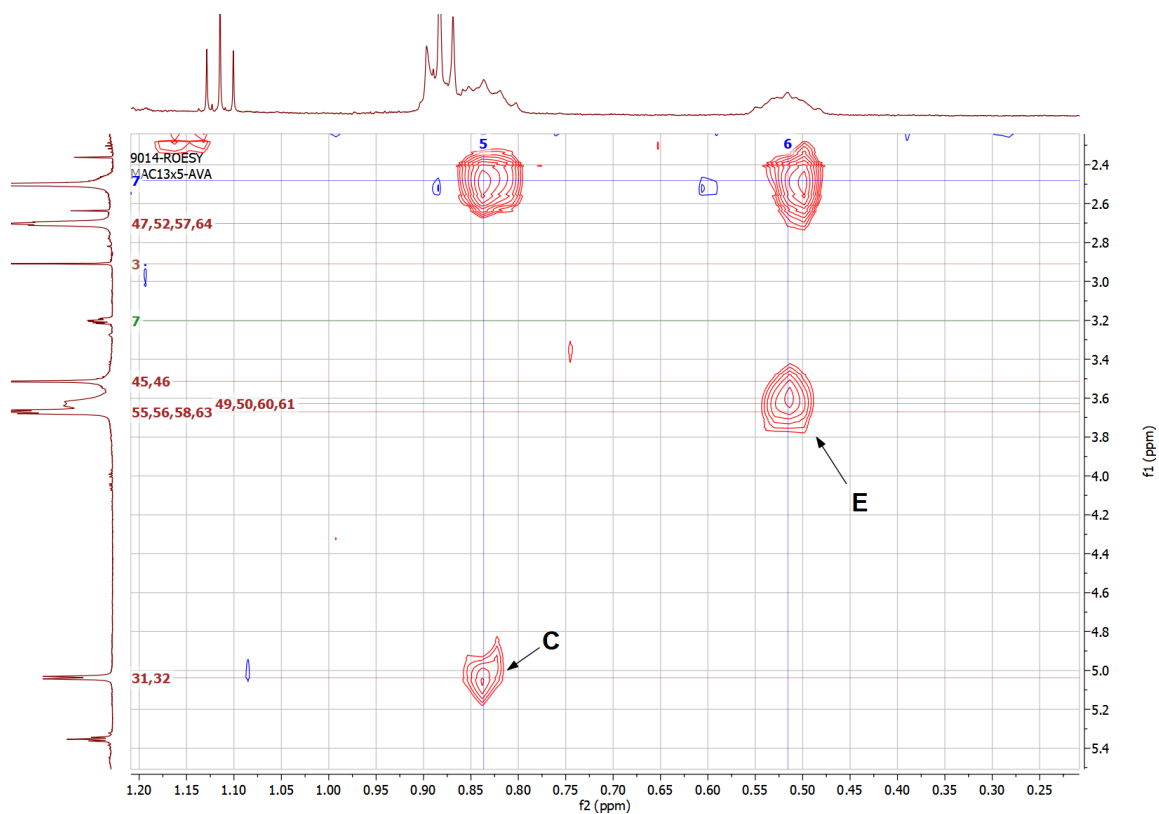

Fig. S32. ROESY NMR spectrum of **1x5-AVA** in  $\text{CD}_3\text{CN}$ .

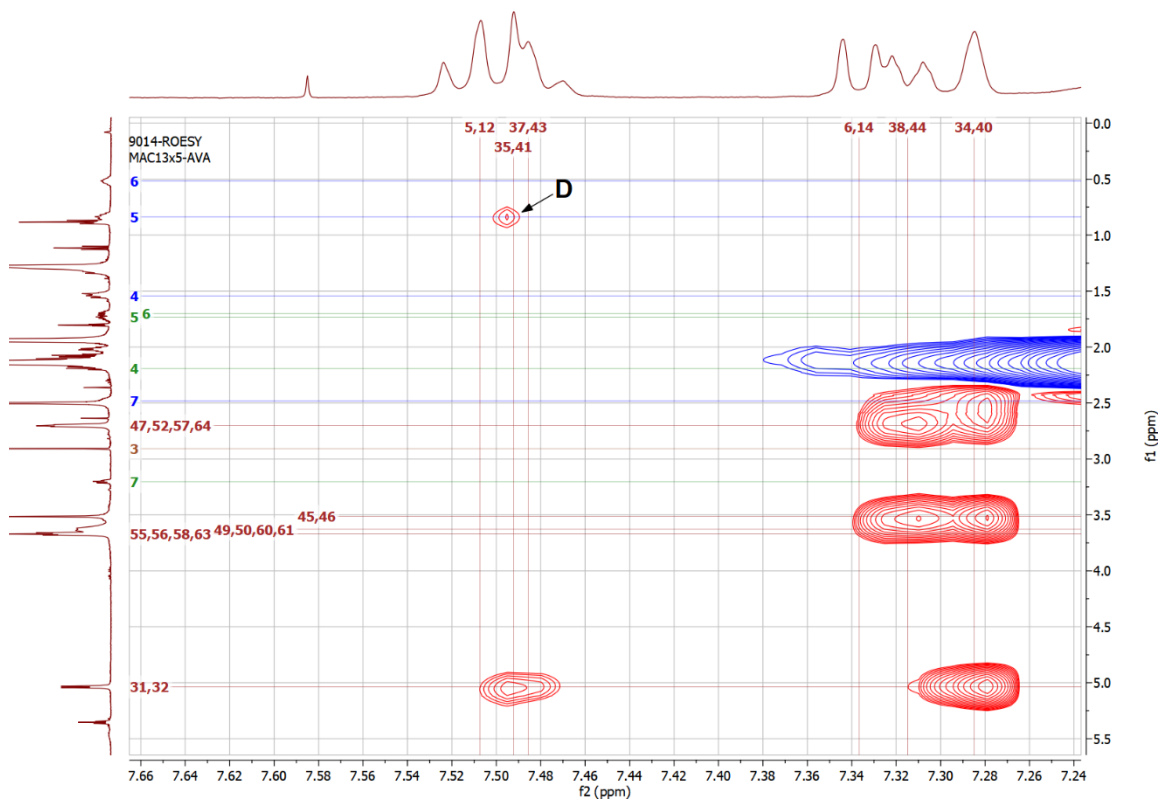

Fig. S33. ROESY NMR spectrum of **1x5-AVA** in  $\text{CD}_3\text{CN}$ .

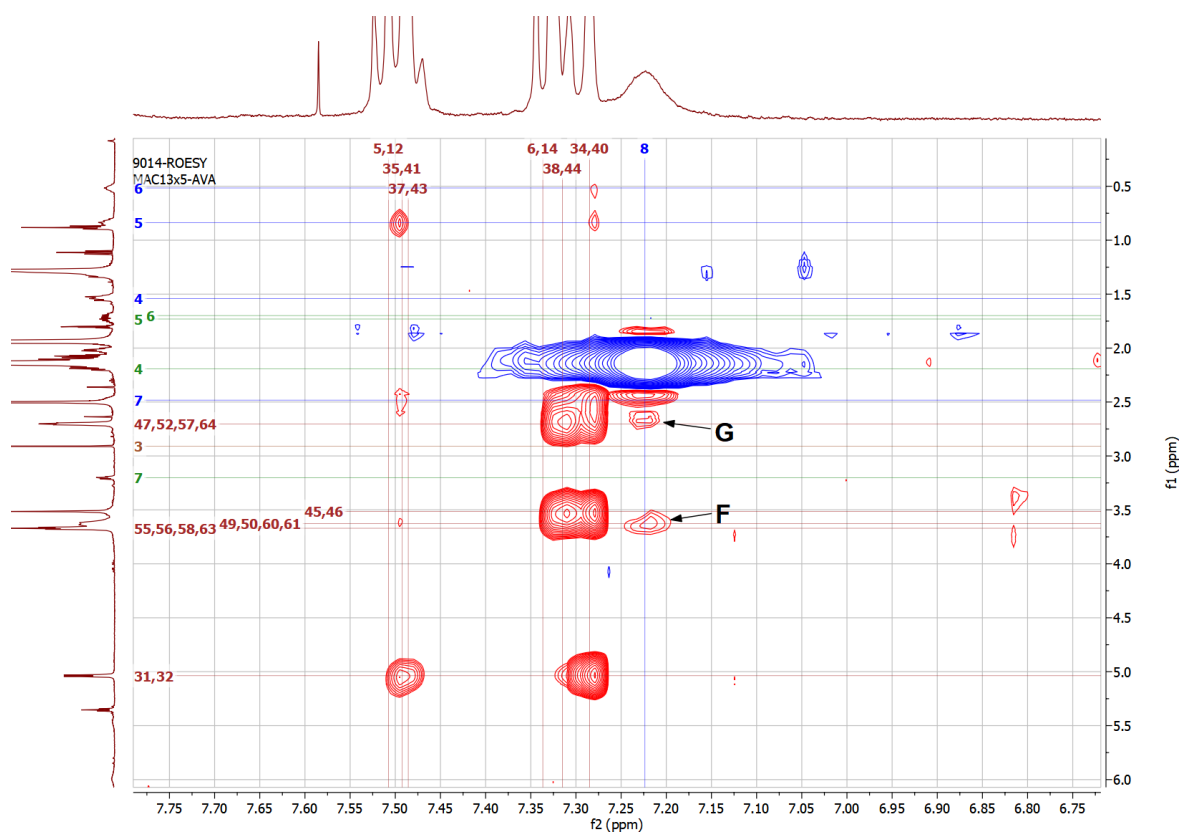

Fig. S34. ROESY NMR spectrum of **1**x5-AVA in CD<sub>3</sub>CN.

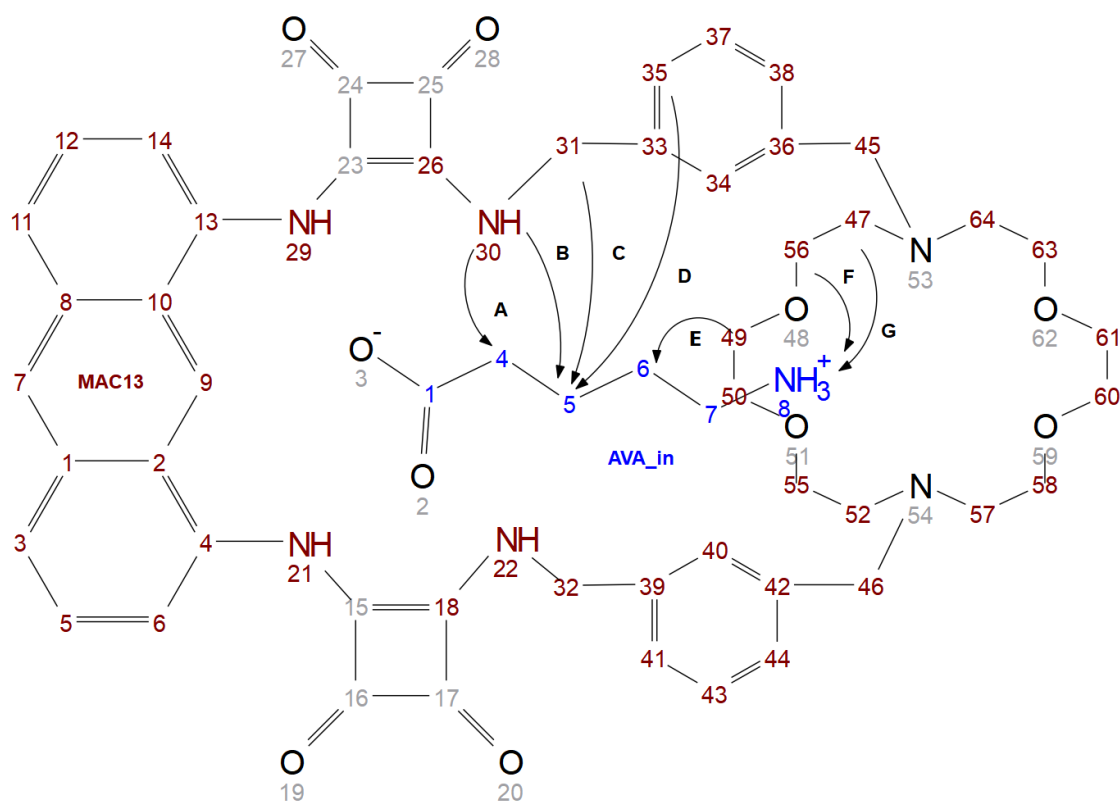

Fig. S35. Interaction scheme of cryptand **1** with the 5-AVA molecule.

### Fluorescence experiments

To the solution of receptor **1** or **2** ( $c = 1.0\text{-}2.0 \times 10^{-6}$  M) in  $\text{CH}_3\text{CN}$  were added aliquots of TBAX solution containing the appropriate receptor at the same concentration as in the cuvette. Successive scans were performed measuring fluorescence ( $\lambda_{\text{ex}} = 418$  nm). Fluorescence emission spectra were measured on a Hitachi F-7100 Fluorescence Spectrophotometer at 298K.

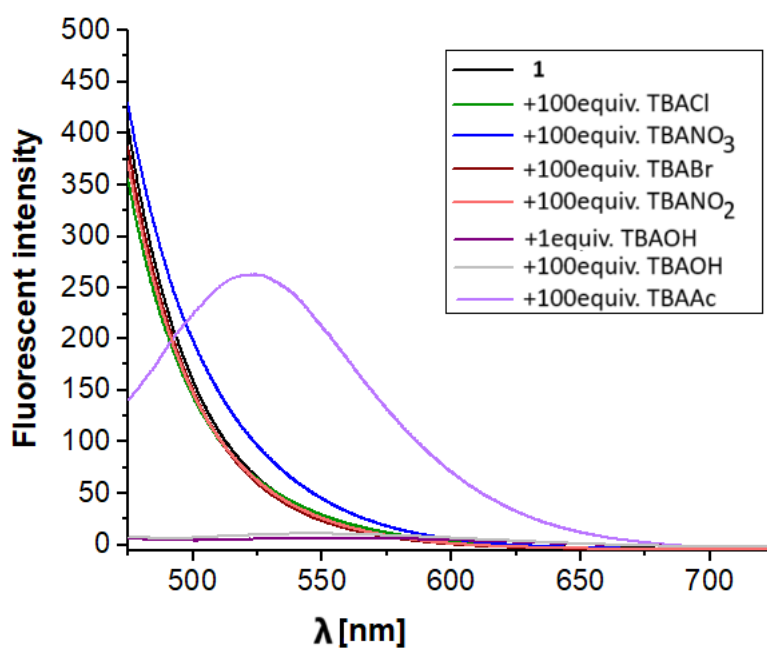

**Fig. S36.** Emission spectra of receptor **1** ( $1.0 \times 10^{-6}$  M) and upon addition of TBA salts (excitation at 418 nm) in  $\text{CH}_3\text{CN}$ .

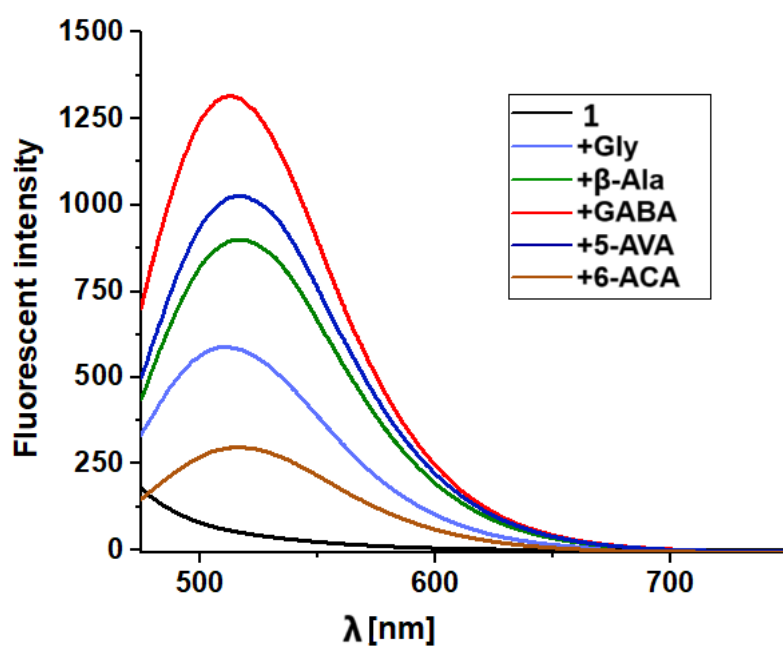

**Fig. S37.** Emission spectra of sensor **1** ( $1.0 \times 10^{-6}$  M) and after amino acid solid-liquid extraction (excitation at 418 nm) in  $\text{CH}_3\text{CN}$ .

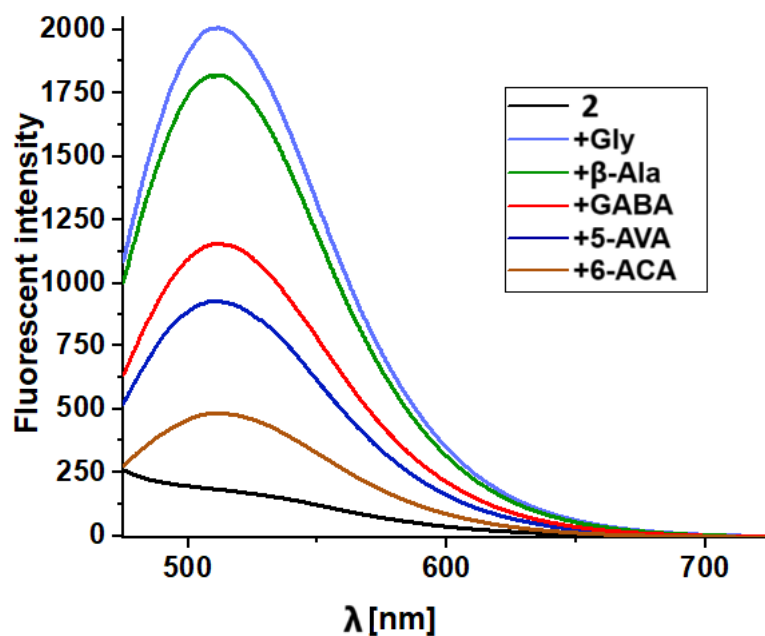

**Fig. S38.** Emission spectra of receptor **2** ( $1.5 \times 10^{-6}$  M) and after amino acid solid-liquid extraction (excitation at 418 nm) in  $\text{CH}_3\text{CN}$ .

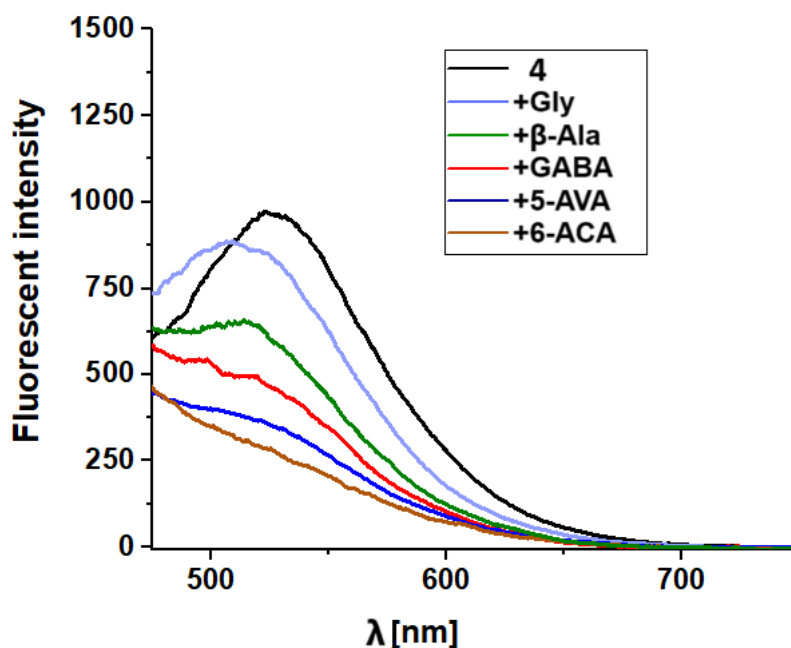

**Fig. S39.** Emission spectra of receptor **4** ( $1.0 \times 10^{-6}$  M) and after amino acid solid-liquid extraction (excitation at 418 nm) in  $\text{CH}_3\text{CN}$ .

## References

- [1] A. Dahan, T. Ashkenazi, V. Kuznetsov, S. Makievski, E. Drug, L. Fadeev, M. Bramson, S. Schokoroy, E. Rozenshine-Kemelmakher, M. Gozin, Synthesis and Evaluation of a Pseudocyclic Tristhiourea-Based Anion Host, *J. Org. Chem.*, 2007, **72**, 7, 2289–2296.
- [2] APEX3 V2019, Bruker Nano, Inc., 2019.
- [3] SAINT V8.40A, Bruker Nano, Inc., 2019.
- [4] SADABS V2016/2, Bruker Nano, Inc., 2019.
- [5] G. M. Sheldrick, SHELXT-Integrated Space-Group and Crystal-Structure Determination, *Acta Cryst.*, 2015, **A 71**, 3-8.
- [6] G. M. Sheldrick, Crystal Structure Refinement with SHELXL, *Acta Cryst.*, 2015, **C71**, 3–8.
- [7] International Tables for Crystallography, Ed. A. J. C. Wilson, Kluwer: Dordrecht, 1992, Vol.C.

[8] C. F. Macrae, I. Sovago, S. J. Cottrell, P. T. A. Galek, P. McCabe, E. Pidcock, M. Platings, G. P. Shields, J. S. Stevens, M. Towler and P. A. Wood, Mercury 4.0: from visualization to analysis, design and prediction, *J. Appl. Cryst.*, 2020, **53**, 226-235.
